# Supplementary material for: On the unprecedented level of dinitrogen activation in the calix[4]arene complex of Nb(iii)
Source: Royal Society of Chemistry journal article supplement (doi:10.1039/c1dt11091h), 2011-01-01
Supplement: c1dt11091h.pdf [file c1dt11091h.pdf]

# Electronic Supporting Information for ‘On the Unprecedented Level of Dinitrogen Activation in the Calix[4]arene Complex of Nb(III)’

R. Terrett, G. Cavigliasso, R. Stranger and B.F. Yates

August 23, 2011

## 1 Notes

In Cartesian coordinate records, Xx denotes a ‘dummy atom’ (*i.e.*, an atom that does not take part in the electronic structure calculation, but which prevents poorly-defined angles in the Z-matrix representation of the molecule.)

Geometries are presented in a two-column layout proceeding from left to right, and are terminated with a single black horizontal line.

Some geometries given are recalculations that may not be perfectly isostructural with those given in the main paper but are otherwise negligibly discrepant.

## 2 Standard geometries

### 2.1 ADF software geometry optimisation, complex (1), $D_{4h}$ symmetry

Table 1: Cartesian coordinates of (1) in  $D_{4h}$  Symmetry GGA Becke Perdew / TZP-ZORA, spin singlet. Equilibrium N–N distance 1.260 Å

| Atom | X         | Y         | Z        |
|------|-----------|-----------|----------|
| Xx   | -1.000000 | 0.000000  | 0.700000 |
| N    | 0.000000  | 0.000000  | 0.630098 |
| Nb   | 0.000000  | 0.000000  | 2.457700 |
| O    | -1.988943 | 0.000000  | 2.903922 |
| O    | 0.000000  | -1.988943 | 2.903922 |
| O    | 1.988943  | 0.000000  | 2.903922 |
| O    | 0.000000  | 1.988943  | 2.903922 |
| C    | -2.641684 | 0.000000  | 4.078736 |

|   |           |           |          |
|---|-----------|-----------|----------|
| C | -3.014834 | 1.224493  | 4.691064 |
| C | -3.783456 | 1.195884  | 5.859462 |
| C | -4.195577 | 0.000000  | 6.470467 |
| C | -3.783456 | -1.195884 | 5.859462 |
| C | -3.014834 | -1.224493 | 4.691064 |
| C | 2.641684  | 0.000000  | 4.078736 |
| C | 3.014834  | -1.224493 | 4.691064 |
| C | 3.783456  | -1.195884 | 5.859462 |
| C | 4.195577  | 0.000000  | 6.470467 |
| C | 3.783456  | 1.195884  | 5.859462 |
| C | 3.014834  | 1.224493  | 4.691064 |
| C | 0.000000  | -2.641684 | 4.078736 |
| C | -1.224493 | -3.014834 | 4.691064 |
| C | -1.195884 | -3.783456 | 5.859462 |
| C | 0.000000  | -4.195577 | 6.470467 |
| C | 1.195884  | -3.783456 | 5.859462 |
| C | 1.224493  | -3.014834 | 4.691064 |
| C | 0.000000  | 2.641684  | 4.078736 |
| C | 1.224493  | 3.014834  | 4.691064 |
| C | 1.195884  | 3.783456  | 5.859462 |
| C | 0.000000  | 4.195577  | 6.470467 |
| C | -1.195884 | 3.783456  | 5.859462 |
| C | -1.224493 | 3.014834  | 4.691064 |
| C | -2.545499 | -2.545499 | 4.101500 |
| C | 2.545499  | -2.545499 | 4.101500 |
| C | 2.545499  | 2.545499  | 4.101500 |
| C | -2.545499 | 2.545499  | 4.101500 |
| H | -3.311959 | -3.311959 | 4.290833 |
| H | -2.430675 | -2.430675 | 3.017504 |
| H | 3.311959  | 3.311959  | 4.290833 |
| H | 2.430675  | 2.430675  | 3.017504 |
| H | 3.311959  | -3.311959 | 4.290833 |

|   |           |           |          |    |           |           |           |
|---|-----------|-----------|----------|----|-----------|-----------|-----------|
| H | 2.430675  | -2.430675 | 3.017504 | H  | -1.191888 | -6.438610 | 8.884821  |
| H | -3.311959 | 3.311959  | 4.290833 | H  | 1.315199  | -6.575710 | 7.108325  |
| H | -2.430675 | 2.430675  | 3.017504 | H  | 2.174455  | -5.280880 | 7.970360  |
| H | -4.059108 | 2.156034  | 6.300336 | H  | 0.885669  | -3.291963 | 8.914653  |
| H | -4.059108 | -2.156034 | 6.300336 | H  | -0.885669 | -3.291963 | 8.914653  |
| C | -4.962841 | 0.000000  | 7.805973 | H  | -2.174455 | -5.280880 | 7.970360  |
| H | 4.059108  | -2.156034 | 6.300336 | H  | -1.315199 | -6.575710 | 7.108325  |
| H | 4.059108  | 2.156034  | 6.300336 | C  | -1.244902 | 5.865185  | 7.945033  |
| C | 4.962841  | 0.000000  | 7.805973 | C  | 0.000000  | 3.940963  | 8.969168  |
| H | -2.156034 | -4.059108 | 6.300336 | C  | 1.244902  | 5.865185  | 7.945033  |
| H | 2.156034  | -4.059108 | 6.300336 | H  | -1.191888 | 6.438610  | 8.884821  |
| C | 0.000000  | -4.962841 | 7.805973 | H  | 0.000000  | 4.453312  | 9.947560  |
| H | 2.156034  | 4.059108  | 6.300336 | H  | 1.191888  | 6.438610  | 8.884821  |
| H | -2.156034 | 4.059108  | 6.300336 | H  | -1.315199 | 6.575710  | 7.108325  |
| C | 0.000000  | 4.962841  | 7.805973 | H  | -2.174455 | 5.280880  | 7.970360  |
| C | -5.865185 | -1.244902 | 7.945033 | H  | -0.885669 | 3.291963  | 8.914653  |
| C | -3.940963 | 0.000000  | 8.969168 | H  | 0.885669  | 3.291963  | 8.914653  |
| C | -5.865185 | 1.244902  | 7.945033 | H  | 2.174455  | 5.280880  | 7.970360  |
| H | -6.438610 | -1.191888 | 8.884821 | H  | 1.315199  | 6.575710  | 7.108325  |
| H | -4.453312 | 0.000000  | 9.947560 | N  | 0.000000  | 0.000000  | -0.630098 |
| H | -6.438610 | 1.191888  | 8.884821 | Xx | 1.000000  | 0.000000  | -0.700000 |
| H | -6.575710 | -1.315199 | 7.108325 | Nb | 0.000000  | 0.000000  | -2.457700 |
| H | -5.280880 | -2.174455 | 7.970360 | O  | 1.988943  | 0.000000  | -2.903922 |
| H | -3.291963 | -0.885669 | 8.914653 | O  | 0.000000  | -1.988943 | -2.903922 |
| H | -3.291963 | 0.885669  | 8.914653 | O  | -1.988943 | 0.000000  | -2.903922 |
| H | -5.280880 | 2.174455  | 7.970360 | O  | 0.000000  | 1.988943  | -2.903922 |
| H | -6.575710 | 1.315199  | 7.108325 | C  | 2.641684  | 0.000000  | -4.078736 |
| C | 5.865185  | 1.244902  | 7.945033 | C  | 3.014834  | 1.224493  | -4.691064 |
| C | 3.940963  | 0.000000  | 8.969168 | C  | 3.783456  | 1.195884  | -5.859462 |
| C | 5.865185  | -1.244902 | 7.945033 | C  | 4.195577  | 0.000000  | -6.470467 |
| H | 6.438610  | 1.191888  | 8.884821 | C  | 3.783456  | -1.195884 | -5.859462 |
| H | 4.453312  | 0.000000  | 9.947560 | C  | 3.014834  | -1.224493 | -4.691064 |
| H | 6.438610  | -1.191888 | 8.884821 | C  | -2.641684 | 0.000000  | -4.078736 |
| H | 6.575710  | 1.315199  | 7.108325 | C  | -3.014834 | -1.224493 | -4.691064 |
| H | 5.280880  | 2.174455  | 7.970360 | C  | -3.783456 | -1.195884 | -5.859462 |
| H | 3.291963  | 0.885669  | 8.914653 | C  | -4.195577 | 0.000000  | -6.470467 |
| H | 3.291963  | -0.885669 | 8.914653 | C  | -3.783456 | 1.195884  | -5.859462 |
| H | 5.280880  | -2.174455 | 7.970360 | C  | -3.014834 | 1.224493  | -4.691064 |
| H | 6.575710  | -1.315199 | 7.108325 | C  | 0.000000  | -2.641684 | -4.078736 |
| C | 1.244902  | -5.865185 | 7.945033 | C  | 1.224493  | -3.014834 | -4.691064 |
| C | 0.000000  | -3.940963 | 8.969168 | C  | 1.195884  | -3.783456 | -5.859462 |
| C | -1.244902 | -5.865185 | 7.945033 | C  | 0.000000  | -4.195577 | -6.470467 |
| H | 1.191888  | -6.438610 | 8.884821 | C  | -1.195884 | -3.783456 | -5.859462 |
| H | 0.000000  | -4.453312 | 9.947560 | C  | -1.224493 | -3.014834 | -4.691064 |

|   |           |           |           |
|---|-----------|-----------|-----------|
| C | 0.000000  | 2.641684  | -4.078736 |
| C | -1.224493 | 3.014834  | -4.691064 |
| C | -1.195884 | 3.783456  | -5.859462 |
| C | 0.000000  | 4.195577  | -6.470467 |
| C | 1.195884  | 3.783456  | -5.859462 |
| C | 1.224493  | 3.014834  | -4.691064 |
| C | 2.545499  | -2.545499 | -4.101500 |
| C | -2.545499 | -2.545499 | -4.101500 |
| C | -2.545499 | 2.545499  | -4.101500 |
| C | 2.545499  | 2.545499  | -4.101500 |
| H | 3.311959  | -3.311959 | -4.290833 |
| H | 2.430675  | -2.430675 | -3.017504 |
| H | -3.311959 | 3.311959  | -4.290833 |
| H | -2.430675 | 2.430675  | -3.017504 |
| H | -3.311959 | -3.311959 | -4.290833 |
| H | -2.430675 | -2.430675 | -3.017504 |
| H | 3.311959  | 3.311959  | -4.290833 |
| H | 2.430675  | 2.430675  | -3.017504 |
| H | 4.059108  | 2.156034  | -6.300336 |
| H | 4.059108  | -2.156034 | -6.300336 |
| H | -4.059108 | -2.156034 | -6.300336 |
| H | -4.059108 | 2.156034  | -6.300336 |
| H | 2.156034  | -4.059108 | -6.300336 |
| H | -2.156034 | -4.059108 | -6.300336 |
| H | -2.156034 | 4.059108  | -6.300336 |
| H | 2.156034  | 4.059108  | -6.300336 |
| C | 4.962841  | 0.000000  | -7.805973 |
| C | 5.865185  | -1.244902 | -7.945033 |
| C | 3.940963  | 0.000000  | -8.969168 |
| C | 5.865185  | 1.244902  | -7.945033 |
| C | -4.962841 | 0.000000  | -7.805973 |
| C | -5.865185 | 1.244902  | -7.945033 |
| C | -3.940963 | 0.000000  | -8.969168 |
| C | -5.865185 | -1.244902 | -7.945033 |
| C | 0.000000  | -4.962841 | -7.805973 |
| C | -1.244902 | -5.865185 | -7.945033 |
| C | 0.000000  | -3.940963 | -8.969168 |
| C | 1.244902  | -5.865185 | -7.945033 |
| C | 0.000000  | 4.962841  | -7.805973 |
| C | 1.244902  | 5.865185  | -7.945033 |
| C | 0.000000  | 3.940963  | -8.969168 |
| C | -1.244902 | 5.865185  | -7.945033 |
| H | 6.438610  | -1.191888 | -8.884821 |
| H | 4.453312  | 0.000000  | -9.947560 |

|   |           |           |           |
|---|-----------|-----------|-----------|
| H | 6.438610  | 1.191888  | -8.884821 |
| H | 6.575710  | -1.315199 | -7.108325 |
| H | 5.280880  | -2.174455 | -7.970360 |
| H | 3.291963  | -0.885669 | -8.914653 |
| H | 3.291963  | 0.885669  | -8.914653 |
| H | 5.280880  | 2.174455  | -7.970360 |
| H | 6.575710  | 1.315199  | -7.108325 |
| H | -6.438610 | 1.191888  | -8.884821 |
| H | -4.453312 | 0.000000  | -9.947560 |
| H | -6.438610 | -1.191888 | -8.884821 |
| H | -6.575710 | 1.315199  | -7.108325 |
| H | -5.280880 | 2.174455  | -7.970360 |
| H | -3.291963 | 0.885669  | -8.914653 |
| H | -3.291963 | -0.885669 | -8.914653 |
| H | -5.280880 | -2.174455 | -7.970360 |
| H | -6.575710 | -1.315199 | -7.108325 |
| H | -1.191888 | -6.438610 | -8.884821 |
| H | 0.000000  | -4.453312 | -9.947560 |
| H | 1.191888  | -6.438610 | -8.884821 |
| H | -1.315199 | -6.575710 | -7.108325 |
| H | -2.174455 | -5.280880 | -7.970360 |
| H | -0.885669 | -3.291963 | -8.914653 |
| H | 0.885669  | -3.291963 | -8.914653 |
| H | 2.174455  | -5.280880 | -7.970360 |
| H | 1.315199  | -6.575710 | -7.108325 |
| H | 1.191888  | 6.438610  | -8.884821 |
| H | 0.000000  | 4.453312  | -9.947560 |
| H | -1.191888 | 6.438610  | -8.884821 |
| H | 1.315199  | 6.575710  | -7.108325 |
| H | 2.174455  | 5.280880  | -7.970360 |
| H | 0.885669  | 3.291963  | -8.914653 |
| H | -0.885669 | 3.291963  | -8.914653 |
| H | -2.174455 | 5.280880  | -7.970360 |
| H | -1.315199 | 6.575710  | -7.108325 |

## 2.2 ADF software geometry optimisation, complex (1), $D_{4d}$ symmetry

Table 2: Cartesian coordinates of (1) in  $D_{4d}$  Symmetry GGA Becke Perdew / TZP-ZORA, spin singlet. Equilibrium N–N distance 1.262 Å

| Atom | X         | Y        | Z        |
|------|-----------|----------|----------|
| C    | -2.283629 | 2.314768 | 4.691462 |
| C    | -1.009757 | 2.437770 | 4.079028 |
| C    | -0.022018 | 3.251558 | 4.691462 |
| C    | -0.342187 | 3.950363 | 5.860363 |
| C    | -1.604078 | 3.872587 | 6.472288 |

|    |           |           |           |   |           |           |           |
|----|-----------|-----------|-----------|---|-----------|-----------|-----------|
| C  | -2.551365 | 3.035291  | 5.860363  | C | 0.342187  | 3.950363  | -5.860363 |
| O  | -0.760300 | 1.835527  | 2.903402  | C | 1.604078  | 3.872587  | -6.472288 |
| Nb | 0.000000  | 0.000000  | 2.456936  | C | 2.551365  | 3.035291  | -5.860363 |
| O  | 1.835527  | 0.760300  | 2.903402  | C | 2.283629  | 2.314768  | -4.691462 |
| C  | 2.437770  | 1.009757  | 4.079028  | C | -1.377329 | 3.325166  | -4.101276 |
| C  | 3.251558  | 0.022018  | 4.691462  | C | -2.314768 | 2.283629  | -4.691462 |
| C  | 3.950363  | 0.342187  | 5.860363  | C | -2.437770 | 1.009757  | -4.079028 |
| C  | 3.872587  | 1.604078  | 6.472288  | C | -3.251558 | 0.022018  | -4.691462 |
| C  | 3.035291  | 2.551365  | 5.860363  | C | -3.950363 | 0.342187  | -5.860363 |
| C  | 2.314768  | 2.283629  | 4.691462  | C | -3.872587 | 1.604078  | -6.472288 |
| C  | 3.325166  | -1.377329 | 4.101276  | C | -3.035291 | 2.551365  | -5.860363 |
| C  | 2.283629  | -2.314768 | 4.691462  | O | -1.835527 | 0.760300  | -2.903402 |
| C  | 1.009757  | -2.437770 | 4.079028  | C | -3.325166 | -1.377329 | -4.101276 |
| C  | 0.022018  | -3.251558 | 4.691462  | C | -2.283629 | -2.314768 | -4.691462 |
| C  | 0.342187  | -3.950363 | 5.860363  | C | -1.009757 | -2.437770 | -4.079028 |
| C  | 1.604078  | -3.872587 | 6.472288  | C | -0.022018 | -3.251558 | -4.691462 |
| C  | 2.551365  | -3.035291 | 5.860363  | C | -0.342187 | -3.950363 | -5.860363 |
| C  | 4.580439  | 1.897280  | 7.809265  | C | -1.604078 | -3.872587 | -6.472288 |
| C  | 5.890313  | 1.092262  | 7.949024  | C | -2.551365 | -3.035291 | -5.860363 |
| C  | 1.377329  | 3.325166  | 4.101276  | C | -4.580439 | 1.897280  | -7.809265 |
| O  | 0.760300  | -1.835527 | 2.903402  | C | -5.890313 | 1.092262  | -7.949024 |
| C  | -1.377329 | -3.325166 | 4.101276  | O | -0.760300 | -1.835527 | -2.903402 |
| C  | -2.314768 | -2.283629 | 4.691462  | C | 1.377329  | -3.325166 | -4.101276 |
| C  | -2.437770 | -1.009757 | 4.079028  | C | 2.314768  | -2.283629 | -4.691462 |
| C  | -3.251558 | -0.022018 | 4.691462  | C | 2.437770  | -1.009757 | -4.079028 |
| C  | -3.950363 | -0.342187 | 5.860363  | C | 3.251558  | -0.022018 | -4.691462 |
| C  | -3.872587 | -1.604078 | 6.472288  | C | 3.950363  | -0.342187 | -5.860363 |
| C  | -3.035291 | -2.551365 | 5.860363  | C | 3.872587  | -1.604078 | -6.472288 |
| O  | -1.835527 | -0.760300 | 2.903402  | C | 3.035291  | -2.551365 | -5.860363 |
| C  | -3.325166 | 1.377329  | 4.101276  | O | 1.835527  | -0.760300 | -2.903402 |
| C  | -4.580439 | -1.897280 | 7.809265  | C | 3.325166  | 1.377329  | -4.101276 |
| C  | -5.890313 | -1.092262 | 7.949024  | C | 4.580439  | -1.897280 | -7.809265 |
| C  | 1.897280  | -4.580439 | 7.809265  | C | 5.890313  | -1.092262 | -7.949024 |
| C  | 1.092262  | -5.890313 | 7.949024  | C | -1.897280 | -4.580439 | -7.809265 |
| C  | -1.897280 | 4.580439  | 7.809265  | C | -1.092262 | -5.890313 | -7.949024 |
| C  | -1.092262 | 5.890313  | 7.949024  | C | 1.897280  | 4.580439  | -7.809265 |
| N  | 0.000000  | 0.000000  | 0.631238  | C | 1.092262  | 5.890313  | -7.949024 |
| Xx | -0.923910 | -0.382643 | 0.694993  | C | 4.937426  | -3.392735 | -7.949024 |
| N  | 0.000000  | 0.000000  | -0.631238 | C | 3.635403  | -1.505833 | -8.971605 |
| Xx | -0.923900 | 0.382715  | -0.695012 | C | -4.937426 | 3.392735  | -7.949024 |
| Nb | 0.000000  | 0.000000  | -2.456936 | C | -3.635403 | 1.505833  | -8.971605 |
| O  | 0.760300  | 1.835527  | -2.903402 | C | -3.392735 | -4.937426 | -7.949024 |
| C  | 1.009757  | 2.437770  | -4.079028 | C | -1.505833 | -3.635403 | -8.971605 |
| C  | 0.022018  | 3.251558  | -4.691462 | C | 3.392735  | 4.937426  | -7.949024 |

|   |           |           |           |   |           |           |           |
|---|-----------|-----------|-----------|---|-----------|-----------|-----------|
| C | 1.505833  | 3.635403  | -8.971605 | H | -1.701696 | -4.108256 | -9.950306 |
| C | -4.937426 | -3.392735 | 7.949024  | H | -1.359850 | -6.398837 | -8.889578 |
| C | -3.635403 | -1.505833 | 8.971605  | H | -3.729851 | -5.567801 | -7.113149 |
| C | 4.937426  | 3.392735  | 7.949024  | H | -4.027455 | -4.041456 | -7.973429 |
| C | 3.635403  | 1.505833  | 8.971605  | H | -2.075892 | -2.697108 | -8.916551 |
| C | 3.392735  | -4.937426 | 7.949024  | H | -0.439266 | -3.375021 | -8.916551 |
| C | 1.505833  | -3.635403 | 8.971605  | H | -0.009900 | -5.705582 | -7.973429 |
| C | -3.392735 | 4.937426  | 7.949024  | H | -1.299627 | -6.574433 | -7.113149 |
| C | -1.505833 | 3.635403  | 8.971605  | H | 3.563102  | 5.486221  | -8.889578 |
| H | 1.791951  | -4.326152 | -4.291658 | H | 1.701696  | 4.108256  | -9.950306 |
| H | 1.315686  | -3.176347 | -3.017180 | H | 1.359850  | 6.398837  | -8.889578 |
| H | -1.791951 | 4.326152  | -4.291658 | H | 3.729851  | 5.567801  | -7.113149 |
| H | -1.315686 | 3.176347  | -3.017180 | H | 4.027455  | 4.041456  | -7.973429 |
| H | -4.326152 | -1.791951 | -4.291658 | H | 2.075892  | 2.697108  | -8.916551 |
| H | -3.176347 | -1.315686 | -3.017180 | H | 0.439266  | 3.375021  | -8.916551 |
| H | 4.326152  | 1.791951  | -4.291658 | H | 0.009900  | 5.705582  | -7.973429 |
| H | 3.176347  | 1.315686  | -3.017180 | H | 1.299627  | 6.574433  | -7.113149 |
| H | 4.571981  | 0.439789  | -6.301293 | H | -1.791951 | -4.326152 | 4.291658  |
| H | 2.921901  | -3.543856 | -6.301293 | H | -1.315686 | -3.176347 | 3.017180  |
| H | -4.571981 | -0.439789 | -6.301293 | H | 1.791951  | 4.326152  | 4.291658  |
| H | -2.921901 | 3.543856  | -6.301293 | H | 1.315686  | 3.176347  | 3.017180  |
| H | 0.439789  | -4.571981 | -6.301293 | H | 4.326152  | -1.791951 | 4.291658  |
| H | -3.543856 | -2.921901 | -6.301293 | H | 3.176347  | -1.315686 | 3.017180  |
| H | -0.439789 | 4.571981  | -6.301293 | H | -4.326152 | 1.791951  | 4.291658  |
| H | 3.543856  | 2.921901  | -6.301293 | H | -3.176347 | 1.315686  | 3.017180  |
| H | 5.486221  | -3.563102 | -8.889578 | H | -4.571981 | 0.439789  | 6.301293  |
| H | 4.108256  | -1.701696 | -9.950306 | H | -2.921901 | -3.543856 | 6.301293  |
| H | 6.398837  | -1.359850 | -8.889578 | H | 4.571981  | -0.439789 | 6.301293  |
| H | 5.567801  | -3.729851 | -7.113149 | H | 2.921901  | 3.543856  | 6.301293  |
| H | 4.041456  | -4.027455 | -7.973429 | H | -0.439789 | -4.571981 | 6.301293  |
| H | 2.697108  | -2.075892 | -8.916551 | H | 3.543856  | -2.921901 | 6.301293  |
| H | 3.375021  | -0.439266 | -8.916551 | H | 0.439789  | 4.571981  | 6.301293  |
| H | 5.705582  | -0.009900 | -7.973429 | H | -3.543856 | 2.921901  | 6.301293  |
| H | 6.574433  | -1.299627 | -7.113149 | H | -5.486221 | -3.563102 | 8.889578  |
| H | -5.486221 | 3.563102  | -8.889578 | H | -4.108256 | -1.701696 | 9.950306  |
| H | -4.108256 | 1.701696  | -9.950306 | H | -6.398837 | -1.359850 | 8.889578  |
| H | -6.398837 | 1.359850  | -8.889578 | H | -5.567801 | -3.729851 | 7.113149  |
| H | -5.567801 | 3.729851  | -7.113149 | H | -4.041456 | -4.027455 | 7.973429  |
| H | -4.041456 | 4.027455  | -7.973429 | H | -2.697108 | -2.075892 | 8.916551  |
| H | -2.697108 | 2.075892  | -8.916551 | H | -3.375021 | -0.439266 | 8.916551  |
| H | -3.375021 | 0.439266  | -8.916551 | H | -5.705582 | -0.009900 | 7.973429  |
| H | -5.705582 | 0.009900  | -7.973429 | H | -6.574433 | -1.299627 | 7.113149  |
| H | -6.574433 | 1.299627  | -7.113149 | H | 5.486221  | 3.563102  | 8.889578  |
| H | -3.563102 | -5.486221 | -8.889578 | H | 4.108256  | 1.701696  | 9.950306  |

|   |           |           |          |
|---|-----------|-----------|----------|
| H | 6.398837  | 1.359850  | 8.889578 |
| H | 5.567801  | 3.729851  | 7.113149 |
| H | 4.041456  | 4.027455  | 7.973429 |
| H | 2.697108  | 2.075892  | 8.916551 |
| H | 3.375021  | 0.439266  | 8.916551 |
| H | 5.705582  | 0.009900  | 7.973429 |
| H | 6.574433  | 1.299627  | 7.113149 |
| H | 3.563102  | -5.486221 | 8.889578 |
| H | 1.701696  | -4.108256 | 9.950306 |
| H | 1.359850  | -6.398837 | 8.889578 |
| H | 3.729851  | -5.567801 | 7.113149 |
| H | 4.027455  | -4.041456 | 7.973429 |
| H | 2.075892  | -2.697108 | 8.916551 |
| H | 0.439266  | -3.375021 | 8.916551 |
| H | 0.009900  | -5.705582 | 7.973429 |
| H | 1.299627  | -6.574433 | 7.113149 |
| H | -3.563102 | 5.486221  | 8.889578 |
| H | -1.701696 | 4.108256  | 9.950306 |
| H | -1.359850 | 6.398837  | 8.889578 |
| H | -3.729851 | 5.567801  | 7.113149 |
| H | -4.027455 | 4.041456  | 7.973429 |
| H | -2.075892 | 2.697108  | 8.916551 |
| H | -0.439266 | 3.375021  | 8.916551 |
| H | -0.009900 | 5.705582  | 7.973429 |
| H | -1.299627 | 6.574433  | 7.113149 |

Table 3: Cartesian coordinates of **(1)** in  $C_{4v}$  broken symmetry GGA Becke Perdew / TZP-ZORA, spin singlet. N.a denotes an  $\alpha$  spin-polarised nitrogen atom. N.b denotes a  $\beta$  spin-polarised nitrogen atom. Equilibrium N–N distance 1.263 Å

| Atom | X         | Y        | Z         |
|------|-----------|----------|-----------|
| C    | -2.995459 | 1.264553 | -0.064648 |
| C    | -1.865670 | 1.865670 | -0.677192 |
| C    | -1.264553 | 2.995459 | -0.064648 |
| C    | -1.827400 | 3.518152 | 1.104608  |
| C    | -2.963277 | 2.963277 | 1.716721  |
| C    | -3.518152 | 1.827400 | 1.104608  |
| O    | -1.404837 | 1.404837 | -1.852897 |
| Nb   | 0.000000  | 0.000000 | -2.299647 |
| O    | 1.404837  | 1.404837 | -1.852897 |
| C    | 1.865670  | 1.865670 | -0.677192 |
| C    | 2.995459  | 1.264553 | -0.064648 |
| C    | 3.518152  | 1.827400 | 1.104608  |
| C    | 2.963277  | 2.963277 | 1.716721  |
| C    | 1.827400  | 3.518152 | 1.104608  |

|     |           |           |            |
|-----|-----------|-----------|------------|
| C   | 1.264553  | 2.995459  | -0.064648  |
| C   | 3.599434  | 0.000000  | -0.654533  |
| C   | 2.995459  | -1.264553 | -0.064648  |
| C   | 1.865670  | -1.865670 | -0.677192  |
| C   | 1.264553  | -2.995459 | -0.064648  |
| C   | 1.827400  | -3.518152 | 1.104608   |
| C   | 2.963277  | -2.963277 | 1.716721   |
| C   | 3.518152  | -1.827400 | 1.104608   |
| C   | 3.505339  | 3.505339  | 3.053450   |
| C   | 5.023599  | 3.262800  | 3.192852   |
| C   | 0.000000  | 3.599434  | -0.654533  |
| O   | 1.404837  | -1.404837 | -1.852897  |
| C   | 0.000000  | -3.599434 | -0.654533  |
| C   | -1.264553 | -2.995459 | -0.064648  |
| C   | -1.865670 | -1.865670 | -0.677192  |
| C   | -2.995459 | -1.264553 | -0.064648  |
| C   | -3.518152 | -1.827400 | 1.104608   |
| C   | -2.963277 | -2.963277 | 1.716721   |
| C   | -1.827400 | -3.518152 | 1.104608   |
| O   | -1.404837 | -1.404837 | -1.852897  |
| C   | -3.599434 | 0.000000  | -0.654533  |
| C   | -3.505339 | -3.505339 | 3.053450   |
| C   | -5.023599 | -3.262800 | 3.192852   |
| C   | 3.505339  | -3.505339 | 3.053450   |
| C   | 3.262800  | -5.023599 | 3.192852   |
| C   | -3.505339 | 3.505339  | 3.053450   |
| C   | -3.262800 | 5.023599  | 3.192852   |
| N.a | 0.000000  | 0.000000  | -4.125415  |
| Xx  | -0.707141 | -0.707090 | -4.061058  |
| N.b | 0.000000  | 0.000000  | -5.387918  |
| Xx  | -1.000031 | 0.000008  | -5.451063  |
| Nb  | 0.000000  | 0.000000  | -7.213687  |
| O   | 0.000000  | 1.986783  | -7.660378  |
| C   | 0.000000  | 2.638617  | -8.836058  |
| C   | -1.223969 | 3.012678  | -9.448399  |
| C   | -1.195591 | 3.781528  | -10.616847 |
| C   | 0.000000  | 4.193281  | -11.228340 |
| C   | 1.195591  | 3.781528  | -10.616847 |
| C   | 1.223969  | 3.012678  | -9.448399  |
| C   | -2.544948 | 2.544948  | -8.858267  |
| C   | -3.012678 | 1.223969  | -9.448399  |
| C   | -2.638617 | 0.000000  | -8.836058  |
| C   | -3.012678 | -1.223969 | -9.448399  |
| C   | -3.781528 | -1.195591 | -10.616847 |

|   |           |           |            |   |           |           |            |
|---|-----------|-----------|------------|---|-----------|-----------|------------|
| C | -4.193281 | 0.000000  | -11.228340 | H | 3.311139  | -3.311139 | -9.048189  |
| C | -3.781528 | 1.195591  | -10.616847 | H | 2.430754  | -2.430754 | -7.774226  |
| O | -1.986783 | 0.000000  | -7.660378  | H | -3.311139 | 3.311139  | -9.048189  |
| C | -2.544948 | -2.544948 | -8.858267  | H | -2.430754 | 2.430754  | -7.774226  |
| C | -1.223969 | -3.012678 | -9.448399  | H | -3.311139 | -3.311139 | -9.048189  |
| C | 0.000000  | -2.638617 | -8.836058  | H | -2.430754 | -2.430754 | -7.774226  |
| C | 1.223969  | -3.012678 | -9.448399  | H | 3.311139  | 3.311139  | -9.048189  |
| C | 1.195591  | -3.781528 | -10.616847 | H | 2.430754  | 2.430754  | -7.774226  |
| C | 0.000000  | -4.193281 | -11.228340 | H | 4.056882  | 2.155929  | -11.057535 |
| C | -1.195591 | -3.781528 | -10.616847 | H | 4.056882  | -2.155929 | -11.057535 |
| C | -4.961486 | 0.000000  | -12.564193 | H | -4.056882 | 2.155929  | -11.057535 |
| C | -5.863974 | -1.244934 | -12.702601 | H | -4.056882 | 2.155929  | -11.057535 |
| O | 0.000000  | -1.986783 | -7.660378  | H | 2.155929  | -4.056882 | -11.057535 |
| C | 2.544948  | -2.544948 | -8.858267  | H | -2.155929 | -4.056882 | -11.057535 |
| C | 3.012678  | -1.223969 | -9.448399  | H | -2.155929 | 4.056882  | -11.057535 |
| C | 2.638617  | 0.000000  | -8.836058  | H | 2.155929  | 4.056882  | -11.057535 |
| C | 3.012678  | 1.223969  | -9.448399  | H | 6.437365  | -1.192400 | -13.642459 |
| C | 3.781528  | 1.195591  | -10.616847 | H | 4.453440  | 0.000000  | -14.705967 |
| C | 4.193281  | 0.000000  | -11.228340 | H | 6.437365  | 1.192400  | -13.642459 |
| C | 3.781528  | -1.195591 | -10.616847 | H | 6.574390  | -1.314824 | -11.865876 |
| O | 1.986783  | 0.000000  | -7.660378  | H | 5.279433  | -2.174392 | -12.727515 |
| C | 2.544948  | 2.544948  | -8.858267  | H | 3.291475  | -0.885717 | -13.673865 |
| C | 4.961486  | 0.000000  | -12.564193 | H | 3.291475  | 0.885717  | -13.673865 |
| C | 5.863974  | 1.244934  | -12.702601 | H | 5.279433  | 2.174392  | -12.727515 |
| C | 0.000000  | -4.961486 | -12.564193 | H | 6.574390  | 1.314824  | -11.865876 |
| C | 1.244934  | -5.863974 | -12.702601 | H | -6.437365 | 1.192400  | -13.642459 |
| C | 0.000000  | 4.961486  | -12.564193 | H | -4.453440 | 0.000000  | -14.705967 |
| C | -1.244934 | 5.863974  | -12.702601 | H | -6.437365 | -1.192400 | -13.642459 |
| C | 5.863974  | -1.244934 | -12.702601 | H | -6.574390 | 1.314824  | -11.865876 |
| C | 3.940283  | 0.000000  | -13.728004 | H | -5.279433 | 2.174392  | -12.727515 |
| C | -5.863974 | 1.244934  | -12.702601 | H | -3.291475 | 0.885717  | -13.673865 |
| C | -3.940283 | 0.000000  | -13.728004 | H | -3.291475 | -0.885717 | -13.673865 |
| C | -1.244934 | -5.863974 | -12.702601 | H | -5.279433 | -2.174392 | -12.727515 |
| C | 0.000000  | -3.940283 | -13.728004 | H | -6.574390 | -1.314824 | -11.865876 |
| C | 1.244934  | 5.863974  | -12.702601 | H | -1.192400 | -6.437365 | -13.642459 |
| C | 0.000000  | 3.940283  | -13.728004 | H | 0.000000  | -4.453440 | -14.705967 |
| C | -3.262800 | -5.023599 | 3.192852   | H | 1.192400  | -6.437365 | -13.642459 |
| C | -2.782473 | -2.782473 | 4.216281   | H | -1.314824 | -6.574390 | -11.865876 |
| C | 3.262800  | 5.023599  | 3.192852   | H | -2.174392 | -5.279433 | -12.727515 |
| C | 2.782473  | 2.782473  | 4.216281   | H | -0.885717 | -3.291475 | -13.673865 |
| C | 5.023599  | -3.262800 | 3.192852   | H | 0.885717  | -3.291475 | -13.673865 |
| C | 2.782473  | -2.782473 | 4.216281   | H | 2.174392  | -5.279433 | -12.727515 |
| C | -5.023599 | 3.262800  | 3.192852   | H | 1.314824  | -6.574390 | -11.865876 |
| C | -2.782473 | 2.782473  | 4.216281   | H | 1.192400  | 6.437365  | -13.642459 |

|   |           |           |            |
|---|-----------|-----------|------------|
| H | 0.000000  | 4.453440  | -14.705967 |
| H | -1.192400 | 6.437365  | -13.642459 |
| H | 1.314824  | 6.574390  | -11.865876 |
| H | 2.174392  | 5.279433  | -12.727515 |
| H | 0.885717  | 3.291475  | -13.673865 |
| H | -0.885717 | 3.291475  | -13.673865 |
| H | -2.174392 | 5.279433  | -12.727515 |
| H | -1.314824 | 6.574390  | -11.865876 |
| H | 0.000000  | -4.682706 | -0.462907  |
| H | 0.000000  | -3.439939 | -1.738922  |
| H | 0.000000  | 4.682706  | -0.462907  |
| H | 0.000000  | 3.439939  | -1.738922  |
| H | 4.682706  | 0.000000  | -0.462907  |
| H | 3.439939  | 0.000000  | -1.738922  |
| H | -4.682706 | 0.000000  | -0.462907  |
| H | -3.439939 | 0.000000  | -1.738922  |
| H | -4.391596 | -1.342702 | 1.545542   |
| H | -1.342702 | -4.391596 | 1.545542   |
| H | 4.391596  | 1.342702  | 1.545542   |
| H | 1.342702  | 4.391596  | 1.545542   |
| H | 1.342702  | -4.391596 | 1.545542   |
| H | 4.391596  | -1.342702 | 1.545542   |
| H | -1.342702 | 4.391596  | 1.545542   |
| H | -4.391596 | 1.342702  | 1.545542   |
| H | -3.704988 | -5.391372 | 4.133094   |
| H | -3.144813 | -3.144813 | 5.194648   |
| H | -5.391372 | -3.704988 | 4.133094   |
| H | -3.715831 | -5.576006 | 2.356640   |
| H | -2.192172 | -5.266893 | 3.217647   |
| H | -1.697440 | -2.950049 | 4.161619   |
| H | -2.950049 | -1.697440 | 4.161619   |
| H | -5.266893 | -2.192172 | 3.217647   |
| H | -5.576006 | -3.715831 | 2.356640   |
| H | 3.704988  | 5.391372  | 4.133094   |
| H | 3.144813  | 3.144813  | 5.194648   |
| H | 5.391372  | 3.704988  | 4.133094   |
| H | 3.715831  | 5.576006  | 2.356640   |
| H | 2.192172  | 5.266893  | 3.217647   |
| H | 1.697440  | 2.950049  | 4.161619   |
| H | 2.950049  | 1.697440  | 4.161619   |
| H | 5.266893  | 2.192172  | 3.217647   |
| H | 5.576006  | 3.715831  | 2.356640   |
| H | 5.391372  | -3.704988 | 4.133094   |
| H | 3.144813  | -3.144813 | 5.194648   |

|   |           |           |          |
|---|-----------|-----------|----------|
| H | 3.704988  | -5.391372 | 4.133094 |
| H | 5.576006  | -3.715831 | 2.356640 |
| H | 5.266893  | -2.192172 | 3.217647 |
| H | 2.950049  | -1.697440 | 4.161619 |
| H | 1.697440  | -2.950049 | 4.161619 |
| H | 2.192172  | -5.266893 | 3.217647 |
| H | 3.715831  | -5.576006 | 2.356640 |
| H | -5.391372 | 3.704988  | 4.133094 |
| H | -3.144813 | 3.144813  | 5.194648 |
| H | -3.704988 | 5.391372  | 4.133094 |
| H | -5.576006 | 3.715831  | 2.356640 |
| H | -5.266893 | 2.192172  | 3.217647 |
| H | -2.950049 | 1.697440  | 4.161619 |
| H | -1.697440 | 2.950049  | 4.161619 |
| H | -2.192172 | 5.266893  | 3.217647 |
| H | -3.715831 | 5.576006  | 2.356640 |

### 2.3 ADF software geometry optimisations, complex (2), $D_{4h}$ symmetry

Table 4: Cartesian coordinates of (2) in  $D_{4h}$  Symmetry GGA Becke Perdew / TZ2P-ZORA, spin singlet. Equilibrium N–N distance 1.265 Å

| Atom | X         | Y         | Z         |
|------|-----------|-----------|-----------|
| C    | -3.039136 | 1.232413  | -4.659014 |
| C    | -2.649649 | 0.000000  | -4.066896 |
| C    | -3.039136 | -1.232413 | -4.659014 |
| C    | -3.873617 | -1.205569 | -5.780326 |
| C    | -4.308491 | 0.000000  | -6.338020 |
| C    | -3.873617 | 1.205569  | -5.780326 |
| O    | -1.957094 | 0.000000  | -2.922250 |
| Nb   | 0.000000  | 0.000000  | -2.450047 |
| O    | 0.000000  | -1.957094 | -2.922250 |
| C    | 0.000000  | -2.649649 | -4.066896 |
| C    | 1.232413  | -3.039136 | -4.659014 |
| C    | 1.205569  | -3.873617 | -5.780326 |
| C    | 0.000000  | -4.308491 | -6.338020 |
| C    | -1.205569 | -3.873617 | -5.780326 |
| C    | -1.232413 | -3.039136 | -4.659014 |
| C    | 2.548989  | -2.548989 | -4.073582 |
| C    | 3.039136  | -1.232413 | -4.659014 |
| C    | 2.649649  | 0.000000  | -4.066896 |
| C    | 3.039136  | 1.232413  | -4.659014 |
| C    | 3.873617  | 1.205569  | -5.780326 |
| C    | 4.308491  | 0.000000  | -6.338020 |
| C    | 3.873617  | -1.205569 | -5.780326 |



|    |           |           |           |
|----|-----------|-----------|-----------|
| C  | -2.548989 | -2.548989 | -4.073582 |
| O  | 1.957094  | 0.000000  | -2.922250 |
| C  | 2.548989  | 2.548989  | -4.073582 |
| C  | 1.232413  | 3.039136  | -4.659014 |
| C  | 0.000000  | 2.649649  | -4.066896 |
| C  | -1.232413 | 3.039136  | -4.659014 |
| C  | -1.205569 | 3.873617  | -5.780326 |
| C  | 0.000000  | 4.308491  | -6.338020 |
| C  | 1.205569  | 3.873617  | -5.780326 |
| O  | 0.000000  | 1.957094  | -2.922250 |
| C  | -2.548989 | 2.548989  | -4.073582 |
| N  | 0.000000  | 0.000000  | -0.632250 |
| H  | 4.970928  | 0.000000  | -7.203959 |
| N  | 0.000000  | 0.000000  | 0.632250  |
| H  | -4.970928 | 0.000000  | -7.203959 |
| Nb | 0.000000  | 0.000000  | 2.450047  |
| O  | -1.957094 | 0.000000  | 2.922250  |
| C  | -2.649649 | 0.000000  | 4.066896  |
| C  | -3.039136 | 1.232413  | 4.659014  |
| C  | -3.873617 | 1.205569  | 5.780326  |
| C  | -4.308491 | 0.000000  | 6.338020  |
| C  | -3.873617 | -1.205569 | 5.780326  |
| C  | -3.039136 | -1.232413 | 4.659014  |
| C  | -2.548989 | 2.548989  | 4.073582  |
| C  | -1.232413 | 3.039136  | 4.659014  |
| C  | 0.000000  | 2.649649  | 4.066896  |
| C  | 1.232413  | 3.039136  | 4.659014  |
| C  | 1.205569  | 3.873617  | 5.780326  |
| C  | 0.000000  | 4.308491  | 6.338020  |
| C  | -1.205569 | 3.873617  | 5.780326  |
| O  | 0.000000  | 1.957094  | 2.922250  |
| C  | 2.548989  | 2.548989  | 4.073582  |
| C  | 3.039136  | 1.232413  | 4.659014  |
| C  | 2.649649  | 0.000000  | 4.066896  |
| C  | 3.039136  | -1.232413 | 4.659014  |
| C  | 3.873617  | -1.205569 | 5.780326  |
| C  | 4.308491  | 0.000000  | 6.338020  |
| C  | 3.873617  | 1.205569  | 5.780326  |
| O  | 1.957094  | 0.000000  | 2.922250  |
| C  | 2.548989  | -2.548989 | 4.073582  |
| C  | 1.232413  | -3.039136 | 4.659014  |
| C  | 0.000000  | -2.649649 | 4.066896  |
| C  | -1.232413 | -3.039136 | 4.659014  |
| C  | -1.205569 | -3.873617 | 5.780326  |

|   |           |           |           |
|---|-----------|-----------|-----------|
| C | 0.000000  | -4.308491 | 6.338020  |
| C | 1.205569  | -3.873617 | 5.780326  |
| O | 0.000000  | -1.957094 | 2.922250  |
| C | -2.548989 | -2.548989 | 4.073582  |
| H | 3.316013  | -3.316013 | 4.253192  |
| H | 2.430817  | -2.430817 | 2.990637  |
| H | -3.316013 | 3.316013  | 4.253192  |
| H | -2.430817 | 2.430817  | 2.990637  |
| H | 3.316013  | 3.316013  | 4.253192  |
| H | 2.430817  | 2.430817  | 2.990637  |
| H | -3.316013 | -3.316013 | 4.253192  |
| H | -2.430817 | -2.430817 | 2.990637  |
| H | -2.152613 | -4.189227 | 6.224124  |
| H | 2.152613  | -4.189227 | 6.224124  |
| H | 0.000000  | -4.970928 | 7.203959  |
| H | 2.152613  | 4.189227  | 6.224124  |
| H | -2.152613 | 4.189227  | 6.224124  |
| H | 0.000000  | 4.970928  | 7.203959  |
| H | 4.189227  | -2.152613 | 6.224124  |
| H | 4.189227  | 2.152613  | 6.224124  |
| H | 4.970928  | 0.000000  | 7.203959  |
| H | -4.189227 | 2.152613  | 6.224124  |
| H | -4.189227 | -2.152613 | 6.224124  |
| H | -4.970928 | 0.000000  | 7.203959  |
| H | 3.316013  | 3.316013  | -4.253192 |
| H | 2.430817  | 2.430817  | -2.990637 |
| H | -3.316013 | -3.316013 | -4.253192 |
| H | -2.430817 | -2.430817 | -2.990637 |
| H | 3.316013  | -3.316013 | -4.253192 |
| H | 2.430817  | -2.430817 | -2.990637 |
| H | -3.316013 | 3.316013  | -4.253192 |
| H | -2.430817 | 2.430817  | -2.990637 |
| H | -2.152613 | 4.189227  | -6.224124 |
| H | 2.152613  | 4.189227  | -6.224124 |
| H | 2.152613  | -4.189227 | -6.224124 |
| H | -2.152613 | -4.189227 | -6.224124 |
| H | 4.189227  | 2.152613  | -6.224124 |
| H | 4.189227  | -2.152613 | -6.224124 |
| H | -4.189227 | -2.152613 | -6.224124 |
| H | -4.189227 | 2.152613  | -6.224124 |
| H | 0.000000  | 4.970928  | -7.203959 |
| H | 0.000000  | -4.970928 | -7.203959 |

Table 5: Cartesian coordinates of **(2)** in  $D_{4h}$  Symmetry Hybrid B3LYP / TZP-ZORA, spin singlet. Equilibrium N–N distance 1.263 Å

| Atom | X        | Y         | Z         |
|------|----------|-----------|-----------|
| C    | 1.261554 | -2.990596 | -4.705773 |

|    |           |           |           |   |           |           |           |
|----|-----------|-----------|-----------|---|-----------|-----------|-----------|
| C  | 1.862353  | -1.862353 | -4.102701 | C | -1.862353 | -1.862353 | 4.102701  |
| C  | 2.990596  | -1.261554 | -4.705773 | C | -2.990596 | -1.261554 | 4.705773  |
| C  | 3.518108  | -1.824012 | -5.863245 | C | -3.518108 | -1.824012 | 5.863245  |
| C  | 2.951667  | -2.951667 | -6.445404 | C | -2.951667 | -2.951667 | 6.445404  |
| C  | 1.824012  | -3.518108 | -5.863245 | C | -1.824012 | -3.518108 | 5.863245  |
| O  | 1.396711  | -1.396711 | -2.939429 | O | -1.396711 | -1.396711 | 2.939429  |
| Nb | 0.000000  | 0.000000  | -2.450611 | C | -3.588527 | 0.000000  | 4.114275  |
| O  | 1.396711  | 1.396711  | -2.939429 | C | -2.990596 | 1.261554  | 4.705773  |
| C  | 1.862353  | 1.862353  | -4.102701 | C | -1.862353 | 1.862353  | 4.102701  |
| C  | 1.261554  | 2.990596  | -4.705773 | C | -1.261554 | 2.990596  | 4.705773  |
| C  | 1.824012  | 3.518108  | -5.863245 | C | -1.824012 | 3.518108  | 5.863245  |
| C  | 2.951667  | 2.951667  | -6.445404 | C | -2.951667 | 2.951667  | 6.445404  |
| C  | 3.518108  | 1.824012  | -5.863245 | C | -3.518108 | 1.824012  | 5.863245  |
| C  | 2.990596  | 1.261554  | -4.705773 | O | -1.396711 | 1.396711  | 2.939429  |
| C  | 0.000000  | 3.588527  | -4.114275 | C | 0.000000  | 3.588527  | 4.114275  |
| C  | -1.261554 | 2.990596  | -4.705773 | C | 1.261554  | 2.990596  | 4.705773  |
| C  | -1.862353 | 1.862353  | -4.102701 | C | 1.862353  | 1.862353  | 4.102701  |
| C  | -2.990596 | 1.261554  | -4.705773 | C | 2.990596  | 1.261554  | 4.705773  |
| C  | -3.518108 | 1.824012  | -5.863245 | C | 3.518108  | 1.824012  | 5.863245  |
| C  | -2.951667 | 2.951667  | -6.445404 | C | 2.951667  | 2.951667  | 6.445404  |
| C  | -1.824012 | 3.518108  | -5.863245 | C | 1.824012  | 3.518108  | 5.863245  |
| C  | 3.588527  | 0.000000  | -4.114275 | O | 1.396711  | 1.396711  | 2.939429  |
| O  | -1.396711 | 1.396711  | -2.939429 | C | 3.588527  | 0.000000  | 4.114275  |
| C  | -3.588527 | 0.000000  | -4.114275 | H | 0.000000  | 4.664774  | 4.293775  |
| C  | -2.990596 | -1.261554 | -4.705773 | H | 0.000000  | 3.426132  | 3.039979  |
| C  | -1.862353 | -1.862353 | -4.102701 | H | 0.000000  | -4.664774 | 4.293775  |
| C  | -1.261554 | -2.990596 | -4.705773 | H | 0.000000  | -3.426132 | 3.039979  |
| C  | -1.824012 | -3.518108 | -5.863245 | H | -4.664774 | 0.000000  | 4.293775  |
| C  | -2.951667 | -2.951667 | -6.445404 | H | -3.426132 | 0.000000  | 3.039979  |
| C  | -3.518108 | -1.824012 | -5.863245 | H | 4.664774  | 0.000000  | 4.293775  |
| O  | -1.396711 | -1.396711 | -2.939429 | H | 3.426132  | 0.000000  | 3.039979  |
| C  | 0.000000  | -3.588527 | -4.114275 | H | 4.388773  | 1.366608  | 6.318233  |
| N  | 0.000000  | 0.000000  | -0.631660 | H | 1.366608  | 4.388773  | 6.318233  |
| N  | 0.000000  | 0.000000  | 0.631660  | H | 3.377343  | 3.377343  | 7.344928  |
| Nb | 0.000000  | 0.000000  | 2.450611  | H | -4.388773 | -1.366608 | 6.318233  |
| O  | 1.396711  | -1.396711 | 2.939429  | H | -1.366608 | -4.388773 | 6.318233  |
| C  | 1.862353  | -1.862353 | 4.102701  | H | -3.377343 | -3.377343 | 7.344928  |
| C  | 1.261554  | -2.990596 | 4.705773  | H | -1.366608 | 4.388773  | 6.318233  |
| C  | 1.824012  | -3.518108 | 5.863245  | H | -4.388773 | 1.366608  | 6.318233  |
| C  | 2.951667  | -2.951667 | 6.445404  | H | -3.377343 | 3.377343  | 7.344928  |
| C  | 3.518108  | -1.824012 | 5.863245  | H | 1.366608  | -4.388773 | 6.318233  |
| C  | 2.990596  | -1.261554 | 4.705773  | H | 4.388773  | -1.366608 | 6.318233  |
| C  | 0.000000  | -3.588527 | 4.114275  | H | 3.377343  | -3.377343 | 7.344928  |
| C  | -1.261554 | -2.990596 | 4.705773  | H | -4.664774 | 0.000000  | -4.293775 |

|   |           |           |           |    |           |           |           |
|---|-----------|-----------|-----------|----|-----------|-----------|-----------|
| H | -3.426132 | 0.000000  | -3.039979 | C  | 3.589545  | 0.000000  | -4.121181 |
| H | 4.664774  | 0.000000  | -4.293775 | O  | -1.378171 | 1.378171  | -2.966077 |
| H | 3.426132  | 0.000000  | -3.039979 | C  | -3.589545 | 0.000000  | -4.121181 |
| H | 0.000000  | 4.664774  | -4.293775 | C  | -2.993098 | -1.264990 | -4.706979 |
| H | 0.000000  | 3.426132  | -3.039979 | C  | -1.859985 | -1.859985 | -4.108629 |
| H | 0.000000  | -4.664774 | -4.293775 | C  | -1.264990 | -2.993098 | -4.706979 |
| H | 0.000000  | -3.426132 | -3.039979 | C  | -1.839222 | -3.530939 | -5.851729 |
| H | -1.366608 | -4.388773 | -6.318233 | C  | -2.971417 | -2.971417 | -6.427491 |
| H | -4.388773 | -1.366608 | -6.318233 | C  | -3.530939 | -1.839222 | -5.851729 |
| H | 1.366608  | 4.388773  | -6.318233 | O  | -1.378171 | -1.378171 | -2.966077 |
| H | 4.388773  | 1.366608  | -6.318233 | C  | 0.000000  | -3.589545 | -4.121181 |
| H | -4.388773 | 1.366608  | -6.318233 | N  | 0.000000  | 0.000000  | -0.635115 |
| H | -1.366608 | 4.388773  | -6.318233 | N  | 0.000000  | 0.000000  | 0.635115  |
| H | 4.388773  | -1.366608 | -6.318233 | Nb | 0.000000  | 0.000000  | 2.444695  |
| H | 1.366608  | -4.388773 | -6.318233 | O  | 1.378171  | -1.378171 | 2.966077  |
| H | -3.377343 | -3.377343 | -7.344928 | C  | 1.859985  | -1.859985 | 4.108629  |
| H | 3.377343  | 3.377343  | -7.344928 | C  | 1.264990  | -2.993098 | 4.706979  |
| H | -3.377343 | 3.377343  | -7.344928 | C  | 1.839222  | -3.530939 | 5.851729  |
| H | 3.377343  | -3.377343 | -7.344928 | C  | 2.971417  | -2.971417 | 6.427491  |

Table 6: Cartesian coordinates of **(2)** in  $D_{4h}$  Symmetry Hybrid B3LYP / TZ2P-ZORA, spin singlet. Equilibrium N–N distance 1.270 Å

| Atom | X         | Y         | Z         |
|------|-----------|-----------|-----------|
| C    | 1.264990  | -2.993098 | -4.706979 |
| C    | 1.859985  | -1.859985 | -4.108629 |
| C    | 2.993098  | -1.264990 | -4.706979 |
| C    | 3.530939  | -1.839222 | -5.851729 |
| C    | 2.971417  | -2.971417 | -6.427491 |
| C    | 1.839222  | -3.530939 | -5.851729 |
| O    | 1.378171  | -1.378171 | -2.966077 |
| Nb   | 0.000000  | 0.000000  | -2.444695 |
| O    | 1.378171  | 1.378171  | -2.966077 |
| C    | 1.859985  | 1.859985  | -4.108629 |
| C    | 1.264990  | 2.993098  | -4.706979 |
| C    | 1.839222  | 3.530939  | -5.851729 |
| C    | 2.971417  | 2.971417  | -6.427491 |
| C    | 3.530939  | 1.839222  | -5.851729 |
| C    | 2.993098  | 1.264990  | -4.706979 |
| C    | 0.000000  | 3.589545  | -4.121181 |
| C    | -1.264990 | 2.993098  | -4.706979 |
| C    | -1.859985 | 1.859985  | -4.108629 |
| C    | -2.993098 | 1.264990  | -4.706979 |
| C    | -3.530939 | 1.839222  | -5.851729 |
| C    | -2.971417 | 2.971417  | -6.427491 |
| C    | -1.839222 | 3.530939  | -5.851729 |

|    |           |           |           |
|----|-----------|-----------|-----------|
| C  | 3.589545  | 0.000000  | -4.121181 |
| O  | -1.378171 | 1.378171  | -2.966077 |
| C  | -3.589545 | 0.000000  | -4.121181 |
| C  | -2.993098 | -1.264990 | -4.706979 |
| C  | -1.859985 | -1.859985 | -4.108629 |
| C  | -1.264990 | -2.993098 | -4.706979 |
| C  | -1.839222 | -3.530939 | -5.851729 |
| C  | -2.971417 | -2.971417 | -6.427491 |
| C  | -3.530939 | -1.839222 | -5.851729 |
| O  | -1.378171 | -1.378171 | -2.966077 |
| C  | 0.000000  | -3.589545 | -4.121181 |
| N  | 0.000000  | 0.000000  | -0.635115 |
| N  | 0.000000  | 0.000000  | 0.635115  |
| Nb | 0.000000  | 0.000000  | 2.444695  |
| O  | 1.378171  | -1.378171 | 2.966077  |
| C  | 1.859985  | -1.859985 | 4.108629  |
| C  | 1.264990  | -2.993098 | 4.706979  |
| C  | 1.839222  | -3.530939 | 5.851729  |
| C  | 2.971417  | -2.971417 | 6.427491  |
| C  | 3.530939  | -1.839222 | 5.851729  |
| C  | 2.993098  | -1.264990 | 4.706979  |
| C  | 0.000000  | -3.589545 | 4.121181  |
| C  | -1.264990 | -2.993098 | 4.706979  |
| C  | -1.859985 | -1.859985 | 4.108629  |
| C  | -2.993098 | -1.264990 | 4.706979  |
| C  | -3.530939 | -1.839222 | 5.851729  |
| C  | -2.971417 | -2.971417 | 6.427491  |
| C  | -1.839222 | -3.530939 | 5.851729  |
| O  | -1.378171 | -1.378171 | 2.966077  |
| C  | 0.000000  | 3.589545  | 4.121181  |
| C  | 1.264990  | 2.993098  | 4.706979  |
| C  | 1.859985  | 1.859985  | 4.108629  |
| C  | 2.993098  | 1.264990  | 4.706979  |
| C  | 3.530939  | 1.839222  | 5.851729  |
| C  | 2.971417  | 2.971417  | 6.427491  |
| C  | 1.839222  | 3.530939  | 5.851729  |

|   |           |           |           |    |           |           |           |
|---|-----------|-----------|-----------|----|-----------|-----------|-----------|
| O | 1.378171  | 1.378171  | 2.966077  | C  | -2.646806 | 0.000000  | -4.118877 |
| C | 3.589545  | 0.000000  | 4.121181  | C  | -3.039653 | -1.232370 | -4.708448 |
| H | 0.000000  | 4.664253  | 4.307224  | C  | -3.880903 | -1.205537 | -5.824681 |
| H | 0.000000  | 3.437097  | 3.045167  | C  | -4.317257 | 0.000000  | -6.381139 |
| H | 0.000000  | -4.664253 | 4.307224  | C  | -3.880903 | 1.205537  | -5.824681 |
| H | 0.000000  | -3.437097 | 3.045167  | O  | -1.951928 | 0.000000  | -2.975993 |
| H | -4.664253 | 0.000000  | 4.307224  | Nb | 0.000000  | 0.000000  | -2.492449 |
| H | -3.437097 | 0.000000  | 3.045167  | O  | 0.000000  | -1.951928 | -2.975993 |
| H | 4.664253  | 0.000000  | 4.307224  | C  | 0.000000  | -2.646806 | -4.118877 |
| H | 3.437097  | 0.000000  | 3.045167  | C  | 1.232370  | -3.039653 | -4.708448 |
| H | 4.405038  | 1.386899  | 6.302827  | C  | 1.205537  | -3.880903 | -5.824681 |
| H | 1.386899  | 4.405038  | 6.302827  | C  | 0.000000  | -4.317257 | -6.381139 |
| H | 3.406518  | 3.406518  | 7.316517  | C  | -1.205537 | -3.880903 | -5.824681 |
| H | -4.405038 | -1.386899 | 6.302827  | C  | -1.232370 | -3.039653 | -4.708448 |
| H | -1.386899 | -4.405038 | 6.302827  | C  | 2.549575  | -2.549575 | -4.124136 |
| H | -3.406518 | -3.406518 | 7.316517  | C  | 3.039653  | -1.232370 | -4.708448 |
| H | -1.386899 | 4.405038  | 6.302827  | C  | 2.646806  | 0.000000  | -4.118877 |
| H | -4.405038 | 1.386899  | 6.302827  | C  | 3.039653  | 1.232370  | -4.708448 |
| H | -3.406518 | 3.406518  | 7.316517  | C  | 3.880903  | 1.205537  | -5.824681 |
| H | 1.386899  | -4.405038 | 6.302827  | C  | 4.317257  | 0.000000  | -6.381139 |
| H | 4.405038  | -1.386899 | 6.302827  | C  | 3.880903  | -1.205537 | -5.824681 |
| H | 3.406518  | -3.406518 | 7.316517  | C  | -2.549575 | -2.549575 | -4.124136 |
| H | -4.664253 | 0.000000  | -4.307224 | O  | 1.951928  | 0.000000  | -2.975993 |
| H | -3.437097 | 0.000000  | -3.045167 | C  | 2.549575  | 2.549575  | -4.124136 |
| H | 4.664253  | 0.000000  | -4.307224 | C  | 1.232370  | 3.039653  | -4.708448 |
| H | 3.437097  | 0.000000  | -3.045167 | C  | 0.000000  | 2.646806  | -4.118877 |
| H | 0.000000  | 4.664253  | -4.307224 | C  | -1.232370 | 3.039653  | -4.708448 |
| H | 0.000000  | 3.437097  | -3.045167 | C  | -1.205537 | 3.880903  | -5.824681 |
| H | 0.000000  | -4.664253 | -4.307224 | C  | 0.000000  | 4.317257  | -6.381139 |
| H | 0.000000  | -3.437097 | -3.045167 | C  | 1.205537  | 3.880903  | -5.824681 |
| H | -1.386899 | -4.405038 | -6.302827 | O  | 0.000000  | 1.951928  | -2.975993 |
| H | -4.405038 | -1.386899 | -6.302827 | C  | -2.549575 | 2.549575  | -4.124136 |
| H | 1.386899  | 4.405038  | -6.302827 | N  | 0.000000  | 0.000000  | -0.695000 |
| H | 4.405038  | 1.386899  | -6.302827 | H  | 4.983007  | 0.000000  | -7.244311 |
| H | -4.405038 | 1.386899  | -6.302827 | N  | 0.000000  | 0.000000  | 0.695000  |
| H | -1.386899 | 4.405038  | -6.302827 | H  | -4.983007 | 0.000000  | -7.244311 |
| H | 4.405038  | -1.386899 | -6.302827 | Nb | 0.000000  | 0.000000  | 2.492449  |
| H | 1.386899  | -4.405038 | -6.302827 | O  | -1.951928 | 0.000000  | 2.975993  |
| H | -3.406518 | -3.406518 | -7.316517 | C  | -2.646806 | 0.000000  | 4.118877  |
| H | 3.406518  | 3.406518  | -7.316517 | C  | -3.039653 | 1.232370  | 4.708448  |
| H | -3.406518 | 3.406518  | -7.316517 | C  | -3.880903 | 1.205537  | 5.824681  |
| H | 3.406518  | -3.406518 | -7.316517 | C  | -4.317257 | 0.000000  | 6.381139  |
|   |           |           |           | C  | -3.880903 | -1.205537 | 5.824681  |
|   |           |           |           | C  | -3.039653 | -1.232370 | 4.708448  |

Table 7: Cartesian coordinates of **(2)** in  $D_{4h}$  Symmetry GGA Becke Perdew / TZ2P-ZORA, spin singlet, with N–N distance constrained to 1.39 Å

| Atom | X         | Y        | Z         |
|------|-----------|----------|-----------|
| C    | -3.039653 | 1.232370 | -4.708448 |

|   |           |           |          |
|---|-----------|-----------|----------|
| C | -2.549575 | 2.549575  | 4.124136 |
| C | -1.232370 | 3.039653  | 4.708448 |
| C | 0.000000  | 2.646806  | 4.118877 |
| C | 1.232370  | 3.039653  | 4.708448 |
| C | 1.205537  | 3.880903  | 5.824681 |
| C | 0.000000  | 4.317257  | 6.381139 |
| C | -1.205537 | 3.880903  | 5.824681 |
| O | 0.000000  | 1.951928  | 2.975993 |
| C | 2.549575  | 2.549575  | 4.124136 |
| C | 3.039653  | 1.232370  | 4.708448 |
| C | 3.880903  | -1.205537 | 5.824681 |
| C | 4.317257  | 0.000000  | 6.381139 |
| C | 3.880903  | 1.205537  | 5.824681 |
| O | 1.951928  | 0.000000  | 2.975993 |
| C | 2.549575  | -2.549575 | 4.124136 |
| C | 1.232370  | -3.039653 | 4.708448 |
| C | 0.000000  | -2.646806 | 4.118877 |
| C | -1.232370 | -3.039653 | 4.708448 |
| C | -1.205537 | -3.880903 | 5.824681 |
| C | 0.000000  | -4.317257 | 6.381139 |
| C | 1.205537  | -3.880903 | 5.824681 |
| O | 0.000000  | -1.951928 | 2.975993 |
| C | -2.549575 | -2.549575 | 4.124136 |
| H | 3.316159  | -3.316159 | 4.306014 |
| H | 2.433144  | -2.433144 | 3.040475 |
| H | -3.316159 | 3.316159  | 4.306014 |
| H | -2.433144 | 2.433144  | 3.040475 |
| H | 3.316159  | 3.316159  | 4.306014 |
| H | 2.433144  | 2.433144  | 3.040475 |
| H | -3.316159 | -3.316159 | 4.306014 |
| H | -2.433144 | -2.433144 | 3.040475 |
| H | -2.152821 | -4.201167 | 6.264856 |
| H | 2.152821  | -4.201167 | 6.264856 |
| H | 0.000000  | -4.983007 | 7.244311 |
| H | 2.152821  | 4.201167  | 6.264856 |
| H | -2.152821 | 4.201167  | 6.264856 |
| H | 0.000000  | 4.983007  | 7.244311 |
| H | 4.201167  | -2.152821 | 6.264856 |
| H | 4.201167  | 2.152821  | 6.264856 |
| H | 4.983007  | 0.000000  | 7.244311 |
| H | -4.201167 | 2.152821  | 6.264856 |
| H | -4.201167 | -2.152821 | 6.264856 |

|   |           |           |           |
|---|-----------|-----------|-----------|
| H | -4.983007 | 0.000000  | 7.244311  |
| H | 3.316159  | 3.316159  | -4.306014 |
| H | 2.433144  | 2.433144  | -3.040475 |
| H | -3.316159 | -3.316159 | -4.306014 |
| H | -2.433144 | -2.433144 | -3.040475 |
| H | 3.316159  | -3.316159 | -4.306014 |
| H | 2.433144  | -2.433144 | -3.040475 |
| H | -3.316159 | 3.316159  | -4.306014 |
| H | -2.433144 | 2.433144  | -3.040475 |
| H | -2.152821 | 4.201167  | -6.264856 |
| H | 2.152821  | 4.201167  | -6.264856 |
| H | 2.152821  | -4.201167 | -6.264856 |
| H | -2.152821 | -4.201167 | -6.264856 |
| H | 4.201167  | 2.152821  | -6.264856 |
| H | 4.201167  | -2.152821 | -6.264856 |
| H | -4.201167 | -2.152821 | -6.264856 |
| H | -4.201167 | 2.152821  | -6.264856 |
| H | 0.000000  | 4.983007  | -7.244311 |
| H | 0.000000  | -4.983007 | -7.244311 |

## 2.4 ADF software geometry optimisations, complex (2), $D_{4d}$ symmetry

Table 8: Cartesian coordinates of (2) in  $D_{4d}$  Symmetry GGA Becke Perdew / TZ2P-ZORA, spin singlet, equilibrium N–N distance is 1.266 Å

| Atom | X         | Y         | Z        |
|------|-----------|-----------|----------|
| C    | -2.332226 | -2.299376 | 4.671972 |
| C    | -2.444926 | -1.012722 | 4.077314 |
| C    | -3.275037 | -0.023229 | 4.671972 |
| C    | -4.027947 | -0.363958 | 5.799780 |
| C    | -3.961524 | -1.640917 | 6.363805 |
| C    | -3.105546 | -2.590831 | 5.799780 |
| O    | -1.808681 | -0.749180 | 2.929486 |
| Nb   | 0.000000  | 0.000000  | 2.452925 |
| O    | -0.749180 | 1.808681  | 2.929486 |
| C    | -1.012722 | 2.444926  | 4.077314 |
| C    | -0.023229 | 3.275037  | 4.671972 |
| C    | -0.363958 | 4.027947  | 5.799780 |
| C    | -1.640917 | 3.961524  | 6.363805 |
| C    | -2.590831 | 3.105546  | 5.799780 |
| C    | -2.299376 | 2.332226  | 4.671972 |
| C    | 1.379265  | 3.329839  | 4.085398 |
| C    | 2.332226  | 2.299376  | 4.671972 |
| C    | 2.444926  | 1.012722  | 4.077314 |
| C    | 3.275037  | 0.023229  | 4.671972 |

|    |           |           |           |   |           |           |           |
|----|-----------|-----------|-----------|---|-----------|-----------|-----------|
| C  | 4.027947  | 0.363958  | 5.799780  | C | 1.012722  | 2.444926  | -4.077314 |
| C  | 3.961524  | 1.640917  | 6.363805  | C | 0.023229  | 3.275037  | -4.671972 |
| C  | 3.105546  | 2.590831  | 5.799780  | C | 0.363958  | 4.027947  | -5.799780 |
| C  | -3.329839 | 1.379265  | 4.085398  | C | 1.640917  | 3.961524  | -6.363805 |
| O  | 1.808681  | 0.749180  | 2.929486  | C | 2.590831  | 3.105546  | -5.799780 |
| C  | 3.329839  | -1.379265 | 4.085398  | O | 0.749180  | 1.808681  | -2.929486 |
| C  | 2.299376  | -2.332226 | 4.671972  | C | -1.379265 | 3.329839  | -4.085398 |
| C  | 1.012722  | -2.444926 | 4.077314  | H | 4.331724  | 1.794259  | -4.266824 |
| C  | 0.023229  | -3.275037 | 4.671972  | H | 3.176190  | 1.315621  | -3.001947 |
| C  | 0.363958  | -4.027947 | 5.799780  | H | -4.331724 | -1.794259 | -4.266824 |
| C  | 1.640917  | -3.961524 | 6.363805  | H | -3.176190 | -1.315621 | -3.001947 |
| C  | 2.590831  | -3.105546 | 5.799780  | H | 1.794259  | -4.331724 | -4.266824 |
| O  | 0.749180  | -1.808681 | 2.929486  | H | 1.315621  | -3.176190 | -3.001947 |
| C  | -1.379265 | -3.329839 | 4.085398  | H | -1.794259 | 4.331724  | -4.266824 |
| N  | 0.000000  | 0.000000  | 0.632975  | H | -1.315621 | 3.176190  | -3.001947 |
| H  | 4.562728  | 1.889944  | 7.238529  | H | -0.391372 | 4.680235  | -6.244396 |
| N  | 0.000000  | 0.000000  | -0.632975 | H | 3.586168  | 3.032684  | -6.244396 |
| H  | -4.562728 | -1.889944 | 7.238529  | H | 1.889944  | 4.562728  | -7.238529 |
| Nb | 0.000000  | 0.000000  | -2.452925 | H | 0.391372  | -4.680235 | -6.244396 |
| O  | -1.808681 | 0.749180  | -2.929486 | H | -3.586168 | -3.032684 | -6.244396 |
| C  | -2.444926 | 1.012722  | -4.077314 | H | -1.889944 | -4.562728 | -7.238529 |
| C  | -3.275037 | 0.023229  | -4.671972 | H | 4.680235  | 0.391372  | -6.244396 |
| C  | -4.027947 | 0.363958  | -5.799780 | H | 3.032684  | -3.586168 | -6.244396 |
| C  | -3.961524 | 1.640917  | -6.363805 | H | 4.562728  | -1.889944 | -7.238529 |
| C  | -3.105546 | 2.590831  | -5.799780 | H | -4.680235 | -0.391372 | -6.244396 |
| C  | -2.332226 | 2.299376  | -4.671972 | H | -3.032684 | 3.586168  | -6.244396 |
| C  | -3.329839 | -1.379265 | -4.085398 | H | -4.562728 | 1.889944  | -7.238529 |
| C  | -2.299376 | -2.332226 | -4.671972 | H | 4.331724  | -1.794259 | 4.266824  |
| C  | -1.012722 | -2.444926 | -4.077314 | H | 3.176190  | -1.315621 | 3.001947  |
| C  | -0.023229 | -3.275037 | -4.671972 | H | -4.331724 | 1.794259  | 4.266824  |
| C  | -0.363958 | -4.027947 | -5.799780 | H | -3.176190 | 1.315621  | 3.001947  |
| C  | -1.640917 | -3.961524 | -6.363805 | H | 1.794259  | 4.331724  | 4.266824  |
| C  | -2.590831 | -3.105546 | -5.799780 | H | 1.315621  | 3.176190  | 3.001947  |
| O  | -0.749180 | -1.808681 | -2.929486 | H | -1.794259 | -4.331724 | 4.266824  |
| C  | 1.379265  | -3.329839 | -4.085398 | H | -1.315621 | -3.176190 | 3.001947  |
| C  | 2.332226  | -2.299376 | -4.671972 | H | -0.391372 | -4.680235 | 6.244396  |
| C  | 2.444926  | -1.012722 | -4.077314 | H | 3.586168  | -3.032684 | 6.244396  |
| C  | 3.275037  | -0.023229 | -4.671972 | H | 0.391372  | 4.680235  | 6.244396  |
| C  | 4.027947  | -0.363958 | -5.799780 | H | -3.586168 | 3.032684  | 6.244396  |
| C  | 3.961524  | -1.640917 | -6.363805 | H | 4.680235  | -0.391372 | 6.244396  |
| C  | 3.105546  | -2.590831 | -5.799780 | H | 3.032684  | 3.586168  | 6.244396  |
| O  | 1.808681  | -0.749180 | -2.929486 | H | -4.680235 | 0.391372  | 6.244396  |
| C  | 3.329839  | 1.379265  | -4.085398 | H | -3.032684 | -3.586168 | 6.244396  |
| C  | 2.299376  | 2.332226  | -4.671972 | H | 1.889944  | -4.562728 | 7.238529  |

H -1.889944 4.562728 7.238529

## 2.5 Asymmetric mono- and disubstituted geometries

Table 9: Cartesian coordinates of dianionic (**2**)H<sub>2</sub> C<sub>s</sub> Symmetry GGA Becke Perdew / TZP-ZORA, spin singlet, equilibrium N–N distance equals 1.441 Å

| Atom | X         | Y         | Z         |
|------|-----------|-----------|-----------|
| C    | 0.150836  | 0.005664  | 3.880915  |
| C    | 1.269452  | 0.076638  | 3.042630  |
| C    | 1.736046  | 1.360720  | 2.651375  |
| C    | 1.048135  | 2.542518  | 3.037824  |
| C    | -0.066584 | 2.415876  | 3.876043  |
| C    | -0.512653 | 1.162005  | 4.309650  |
| C    | 1.999731  | -1.175169 | 2.563642  |
| C    | 1.498895  | -1.724323 | 1.231602  |
| C    | 2.096443  | -1.319742 | 0.000000  |
| C    | 1.498895  | -1.724323 | -1.231602 |
| C    | 0.434862  | -2.634895 | -1.204279 |
| C    | -0.087302 | -3.116644 | 0.000000  |
| C    | 0.434862  | -2.634895 | 1.204279  |
| C    | 1.999731  | -1.175169 | -2.563642 |
| C    | 1.269452  | 0.076638  | -3.042630 |
| C    | 1.736046  | 1.360720  | -2.651375 |
| C    | 1.048135  | 2.542518  | -3.037824 |
| C    | -0.066584 | 2.415876  | -3.876043 |
| C    | -0.512653 | 1.162005  | -4.309650 |
| C    | 0.150836  | 0.005664  | -3.880915 |
| C    | 1.545313  | 3.905206  | -2.561380 |
| C    | 0.957945  | 4.379702  | -1.235135 |
| C    | 1.592384  | 4.050541  | 0.000000  |
| C    | 0.957945  | 4.379702  | 1.235135  |
| C    | -0.208226 | 5.152514  | 1.206782  |
| C    | -0.784020 | 5.566988  | 0.000000  |
| C    | -0.208226 | 5.152514  | -1.206782 |
| O    | 2.802171  | 3.475103  | 0.000000  |
| Nb.a | 3.322546  | 1.497184  | 0.000000  |
| O    | 2.881592  | 1.460342  | -1.960304 |
| C    | 1.545313  | 3.905206  | 2.561380  |
| O    | 3.225551  | -0.587344 | 0.000000  |
| O    | 2.881592  | 1.460342  | 1.960304  |
| N    | 5.285439  | 1.432620  | 0.000000  |
| N    | 6.155966  | 0.284747  | 0.000000  |

|                |           |           |           |
|----------------|-----------|-----------|-----------|
| Nb.b           | 8.119163  | 0.238816  | 0.000000  |
| O              | 8.563482  | 0.279484  | -1.956356 |
| C              | 9.702182  | 0.391528  | -2.656628 |
| C              | 10.395960 | -0.784582 | -3.048514 |
| C              | 11.508971 | -0.648615 | -3.887078 |
| C              | 11.946803 | 0.610052  | -4.316370 |
| C              | 11.274405 | 1.760685  | -3.886212 |
| C              | 10.155855 | 1.679527  | -3.048272 |
| C              | 9.912022  | -2.147690 | -2.562707 |
| C              | 10.512840 | -2.597765 | -1.234245 |
| C              | 11.714502 | -3.314224 | -1.206008 |
| C              | 12.311855 | -3.697346 | 0.000000  |
| C              | 11.714502 | -3.314224 | 1.206008  |
| C              | 10.512840 | -2.597765 | 1.234245  |
| C              | 9.864757  | -2.291730 | 0.000000  |
| O              | 8.635433  | -1.752442 | 0.000000  |
| C              | 9.912022  | -2.147690 | 2.562707  |
| C              | 10.395960 | -0.784582 | 3.048514  |
| C              | 9.702182  | 0.391528  | 2.656628  |
| C              | 10.155855 | 1.679527  | 3.048272  |
| C              | 11.274405 | 1.760685  | 3.886212  |
| C              | 11.946803 | 0.610052  | 4.316370  |
| C              | 11.508971 | -0.648615 | 3.887078  |
| C              | 9.417090  | 2.923566  | -2.564434 |
| C              | 9.917709  | 3.468875  | -1.231166 |
| C              | 9.320962  | 3.062999  | 0.000000  |
| C              | 9.917709  | 3.468875  | 1.231166  |
| C              | 10.985518 | 4.374813  | 1.204105  |
| C              | 11.510440 | 4.853582  | 0.000000  |
| C              | 10.985518 | 4.374813  | -1.204105 |
| O              | 8.194482  | 2.325711  | 0.000000  |
| C              | 9.417090  | 2.923566  | 2.564434  |
| O              | 8.563482  | 0.279484  | 1.956356  |
| X <sub>x</sub> | 6.419211  | 0.839261  | 0.986847  |
| X <sub>x</sub> | 5.025045  | 0.917978  | 0.987302  |
| H              | 5.893538  | 2.260182  | 0.000000  |
| H              | 5.549987  | -0.544084 | 0.000000  |
| H              | 10.162975 | -2.896519 | -3.329108 |
| H              | 8.820496  | -2.114504 | -2.462412 |
| H              | 9.530758  | 3.709949  | 3.325915  |
| H              | 8.350282  | 2.686923  | 2.473501  |
| H              | 9.530758  | 3.709949  | -3.325915 |
| H              | 8.350282  | 2.686923  | -2.473501 |
| H              | 10.162975 | -2.896519 | 3.329108  |



|   |           |           |           |      |           |           |           |
|---|-----------|-----------|-----------|------|-----------|-----------|-----------|
| H | 8.820496  | -2.114504 | 2.462412  | C    | 1.358657  | -1.817828 | -1.239035 |
| H | 12.193832 | -3.574508 | 2.154260  | C    | 0.331721  | -2.769048 | -1.210394 |
| H | 12.193832 | -3.574508 | -2.154260 | C    | -0.172198 | -3.251292 | 0.000000  |
| H | 13.240585 | -4.270760 | 0.000000  | C    | 0.331721  | -2.769048 | 1.210394  |
| H | 11.416611 | 4.708160  | -2.152666 | C    | 1.889441  | -1.266502 | -2.554792 |
| H | 11.416611 | 4.708160  | 2.152666  | C    | 1.191894  | 0.007757  | -3.015572 |
| H | 12.331278 | 5.573434  | 0.000000  | C    | 1.679426  | 1.279933  | -2.632041 |
| H | 12.040933 | -1.547185 | -4.212121 | C    | 1.019254  | 2.471637  | -3.015609 |
| H | 11.623152 | 2.744882  | -4.211412 | C    | -0.112529 | 2.365914  | -3.832503 |
| H | 12.810519 | 0.694452  | -4.978797 | C    | -0.589670 | 1.121370  | -4.250205 |
| H | 11.623152 | 2.744882  | 4.211412  | C    | 0.057053  | -0.044684 | -3.833782 |
| H | 12.040933 | -1.547185 | 4.212121  | C    | 1.534300  | 3.830546  | -2.556083 |
| H | 12.810519 | 0.694452  | 4.978797  | C    | 0.934492  | 4.306187  | -1.239906 |
| H | 1.299089  | 4.649538  | -3.333686 | C    | 1.509124  | 3.941537  | 0.000000  |
| H | 2.637215  | 3.861486  | -2.466836 | C    | 0.934492  | 4.306187  | 1.239906  |
| H | 1.880219  | -1.957359 | 3.328549  | C    | -0.211489 | 5.109731  | 1.210897  |
| H | 3.068175  | -0.945498 | 2.473026  | C    | -0.775926 | 5.519605  | 0.000000  |
| H | 1.880219  | -1.957359 | -3.328549 | C    | -0.211489 | 5.109731  | -1.210897 |
| H | 3.068175  | -0.945498 | -2.473026 | O    | 2.679144  | 3.237250  | 0.000000  |
| H | 1.299089  | 4.649538  | 3.333686  | Nb.a | 3.283642  | 1.398777  | 0.000000  |
| H | 2.637215  | 3.861486  | 2.466836  | O    | 2.841399  | 1.363030  | -1.928152 |
| H | -0.672629 | 5.438741  | 2.154988  | C    | 1.534300  | 3.830546  | 2.556083  |
| H | -0.672629 | 5.438741  | -2.154988 | O    | 2.939462  | -0.515472 | 0.000000  |
| H | 0.005475  | -2.971714 | -2.152431 | O    | 2.841399  | 1.363030  | 1.928152  |
| H | 0.005475  | -2.971714 | 2.152431  | N    | 5.270566  | 1.503581  | 0.000000  |
| H | -0.590260 | 3.319060  | -4.201153 | N    | 6.165139  | 0.431397  | 0.000000  |
| H | -0.204123 | -0.974969 | -4.209083 | Nb.b | 8.153486  | 0.473792  | 0.000000  |
| H | -0.204123 | -0.974969 | 4.209083  | O    | 8.602215  | 0.478344  | -1.927646 |
| H | -0.590260 | 3.319060  | 4.201153  | C    | 9.768683  | 0.485983  | -2.629078 |
| H | -1.679561 | 6.190281  | 0.000000  | C    | 10.353809 | -0.745006 | -3.010777 |
| H | -0.903304 | -3.841775 | 0.000000  | C    | 11.494970 | -0.711019 | -3.820875 |
| H | -1.374170 | 1.085598  | -4.975721 | C    | 12.053486 | 0.500763  | -4.234886 |
| H | -1.374170 | 1.085598  | 4.975721  | C    | 11.477836 | 1.705100  | -3.823506 |
|   |           |           |           | C    | 10.337141 | 1.724006  | -3.012023 |
|   |           |           |           | C    | 9.751566  | -2.068775 | -2.555974 |
|   |           |           |           | C    | 10.316244 | -2.582581 | -1.239107 |
|   |           |           |           | C    | 11.406677 | -3.459891 | -1.210282 |
|   |           |           |           | C    | 11.942728 | -3.906562 | 0.000000  |
|   |           |           |           | C    | 11.406677 | -3.459891 | 1.210282  |
|   |           |           |           | C    | 10.316244 | -2.582581 | 1.239107  |
|   |           |           |           | C    | 9.765817  | -2.180187 | 0.000000  |
|   |           |           |           | O    | 8.644652  | -1.399366 | 0.000000  |
|   |           |           |           | C    | 9.751566  | -2.068775 | 2.555974  |
|   |           |           |           | C    | 10.353809 | -0.745006 | 3.010777  |

Table 10: Cartesian coordinates of neutral **(2)**H<sub>2</sub> C<sub>s</sub> Symmetry GGA Becke Perdew / TZP-ZORA, spin singlet, equilibrium N–N distance equals 1.396 Å

| Atom | X         | Y         | Z        |
|------|-----------|-----------|----------|
| C    | 0.057053  | -0.044684 | 3.833782 |
| C    | 1.191894  | 0.007757  | 3.015572 |
| C    | 1.679426  | 1.279933  | 2.632041 |
| C    | 1.019254  | 2.471637  | 3.015609 |
| C    | -0.112529 | 2.365914  | 3.832503 |
| C    | -0.589670 | 1.121370  | 4.250205 |
| C    | 1.889441  | -1.266502 | 2.554792 |
| C    | 1.358657  | -1.817828 | 1.239035 |
| C    | 1.878007  | -1.377688 | 0.000000 |



|    |           |           |           |
|----|-----------|-----------|-----------|
| C  | 9.768683  | 0.485983  | 2.629078  |
| C  | 10.337141 | 1.724006  | 3.012023  |
| C  | 11.477836 | 1.705100  | 3.823506  |
| C  | 12.053486 | 0.500763  | 4.234886  |
| C  | 11.494970 | -0.711019 | 3.820875  |
| C  | 9.717003  | 3.039393  | -2.556718 |
| C  | 10.275296 | 3.556593  | -1.238658 |
| C  | 9.724491  | 3.154120  | 0.000000  |
| C  | 10.275296 | 3.556593  | 1.238658  |
| C  | 11.366534 | 4.433359  | 1.209889  |
| C  | 11.902920 | 4.879923  | 0.000000  |
| C  | 11.366534 | 4.433359  | -1.209889 |
| O  | 8.606650  | 2.365368  | 0.000000  |
| C  | 9.717003  | 3.039393  | 2.556718  |
| O  | 8.602215  | 0.478344  | 1.927646  |
| Xx | 6.419938  | 0.838398  | 0.986798  |
| Xx | 5.025787  | 0.917779  | 0.986842  |
| H  | 5.775199  | 2.394759  | 0.000000  |
| H  | 5.655709  | -0.457639 | 0.000000  |
| H  | 9.945345  | -2.822785 | -3.330343 |
| H  | 8.664918  | -1.954086 | -2.467055 |
| H  | 9.902450  | 3.796452  | 3.330126  |
| H  | 8.631858  | 2.910440  | 2.469553  |
| H  | 9.902450  | 3.796452  | -3.330126 |
| H  | 8.631858  | 2.910440  | -2.469553 |
| H  | 9.945345  | -2.822785 | 3.330343  |
| H  | 8.664918  | -1.954086 | 2.467055  |
| H  | 11.837494 | -3.801737 | 2.152910  |
| H  | 11.837494 | -3.801737 | -2.152910 |
| H  | 12.783937 | -4.599346 | 0.000000  |
| H  | 11.798672 | 4.772863  | -2.152783 |
| H  | 11.798672 | 4.772863  | 2.152783  |
| H  | 12.745850 | 5.570468  | 0.000000  |
| H  | 11.947722 | -1.652240 | -4.138989 |
| H  | 11.916719 | 2.651834  | -4.144517 |
| H  | 12.934231 | 0.506211  | -4.876512 |
| H  | 11.916719 | 2.651834  | 4.144517  |
| H  | 11.947722 | -1.652240 | 4.138989  |
| H  | 12.934231 | 0.506211  | 4.876512  |
| H  | 1.296108  | 4.571610  | -3.330508 |
| H  | 2.625822  | 3.784934  | -2.463537 |
| H  | 1.756946  | -2.034226 | 3.328577  |
| H  | 2.964036  | -1.070037 | 2.461304  |
| H  | 1.756946  | -2.034226 | -3.328577 |

|   |           |           |           |
|---|-----------|-----------|-----------|
| H | 2.964036  | -1.070037 | -2.461304 |
| H | 1.296108  | 4.571610  | 3.330508  |
| H | 2.625822  | 3.784934  | 2.463537  |
| H | -0.663535 | 5.423050  | 2.153544  |
| H | -0.663535 | 5.423050  | -2.153544 |
| H | -0.072551 | -3.142128 | -2.153067 |
| H | -0.072551 | -3.142128 | 2.153067  |
| H | -0.622436 | 3.276468  | -4.153396 |
| H | -0.320951 | -1.017223 | -4.155415 |
| H | -0.320951 | -1.017223 | 4.155415  |
| H | -0.622436 | 3.276468  | 4.153396  |
| H | -1.661094 | 6.155530  | 0.000000  |
| H | -0.960514 | -4.004143 | 0.000000  |
| H | -1.464238 | 1.060561  | -4.897481 |
| H | -1.464238 | 1.060561  | 4.897481  |

Table 11: Cartesian coordinates of anionic (**2**)H C<sub>s</sub> Symmetry GGA Becke Perdew / TZP-ZORA, spin singlet, equilibrium N–N distance equals 1.327 Å

| Atom | X        | Y         | Z         |
|------|----------|-----------|-----------|
| C    | 5.856386 | 3.916937  | 1.211319  |
| C    | 4.744168 | 3.067265  | 1.239859  |
| C    | 4.195177 | 2.668863  | 0.000000  |
| C    | 4.744168 | 3.067265  | -1.239859 |
| C    | 5.856386 | 3.916937  | -1.211319 |
| C    | 6.408431 | 4.344314  | 0.000000  |
| C    | 4.136491 | 2.581392  | 2.548767  |
| C    | 4.684057 | 1.244892  | 3.032897  |
| C    | 4.063404 | 0.025997  | 2.652594  |
| C    | 4.621907 | -1.219952 | 3.039951  |
| C    | 5.750959 | -1.219668 | 3.867554  |
| C    | 6.339676 | -0.026489 | 4.294438  |
| C    | 5.810276 | 1.192343  | 3.862618  |
| C    | 4.011705 | -2.528283 | 2.555298  |
| C    | 4.593974 | -3.017912 | 1.236893  |
| C    | 4.036378 | -2.613513 | 0.000000  |
| C    | 4.593974 | -3.017912 | -1.236893 |
| C    | 5.706262 | -3.869176 | -1.208722 |
| C    | 6.259259 | -4.298811 | 0.000000  |
| C    | 5.706262 | -3.869176 | 1.208722  |
| C    | 4.011705 | -2.528283 | -2.555298 |
| C    | 4.621907 | -1.219952 | -3.039951 |
| C    | 4.063404 | 0.025997  | -2.652594 |
| C    | 4.684057 | 1.244892  | -3.032897 |
| C    | 5.810276 | 1.192343  | -3.862618 |

|    |           |           |           |   |           |           |           |
|----|-----------|-----------|-----------|---|-----------|-----------|-----------|
| C  | 6.339676  | -0.026489 | -4.294438 | H | 0.430727  | 1.509675  | 0.000000  |
| C  | 5.750959  | -1.219668 | -3.867554 | H | 4.332549  | 3.337726  | 3.321262  |
| O  | 2.896828  | 0.055667  | -1.966269 | H | 3.049621  | 2.494738  | 2.432434  |
| Nb | 2.469995  | 0.061277  | 0.000000  | H | 4.189073  | -3.300074 | -3.317292 |
| O  | 3.070571  | 1.908243  | 0.000000  | H | 2.928058  | -2.403059 | -2.447950 |
| C  | 4.136491  | 2.581392  | -2.548767 | H | 4.189073  | -3.300074 | 3.317292  |
| O  | 2.911614  | -1.838233 | 0.000000  | H | 2.928058  | -2.403059 | 2.447950  |
| O  | 2.896828  | 0.055667  | 1.966269  | H | 4.332549  | 3.337726  | -3.321262 |
| N  | 0.536059  | 0.479693  | 0.000000  | H | 3.049621  | 2.494738  | -2.432434 |
| N  | -0.624165 | -0.164139 | 0.000000  | H | 6.292891  | 4.250444  | -2.154945 |
| Nb | -2.467836 | -0.104284 | 0.000000  | H | 6.292891  | 4.250444  | 2.154945  |
| O  | -2.935740 | -2.040492 | 0.000000  | H | 7.271636  | 5.008209  | 0.000000  |
| C  | -4.122473 | -2.692484 | 0.000000  | H | 6.144839  | -4.200121 | 2.152825  |
| C  | -4.713934 | -3.059690 | 1.235975  | H | 6.144839  | -4.200121 | -2.152825 |
| C  | -5.856276 | -3.868885 | 1.208233  | H | 7.123712  | -4.963424 | 0.000000  |
| C  | -6.420900 | -4.287638 | 0.000000  | H | 6.277585  | 2.127944  | 4.178027  |
| C  | -5.856276 | -3.868885 | -1.208233 | H | 6.172997  | -2.175559 | 4.186357  |
| C  | -4.713934 | -3.059690 | -1.235975 | H | 7.209468  | -0.046121 | 4.951683  |
| C  | -4.121027 | -2.581070 | 2.555791  | H | 6.172997  | -2.175559 | -4.186357 |
| C  | -4.684569 | -1.250762 | 3.040055  | H | 6.277585  | 2.127944  | -4.178027 |
| C  | -4.068069 | -0.031201 | 2.653654  | H | 7.209468  | -0.046121 | -4.951683 |
| C  | -4.632307 | 1.215458  | 3.034746  | H | -4.322383 | -3.342750 | 3.322716  |
| C  | -5.763835 | 1.214177  | 3.859574  | H | -3.034118 | -2.486140 | 2.446697  |
| C  | -6.349786 | 0.020726  | 4.290153  | H | -4.196423 | 3.294097  | -3.317075 |
| C  | -5.812945 | -1.198993 | 3.866213  | H | -2.942560 | 2.393592  | -2.435142 |
| C  | -4.025019 | 2.524824  | 2.550001  | H | -4.196423 | 3.294097  | 3.317075  |
| C  | -4.607592 | 3.022112  | 1.234175  | H | -2.942560 | 2.393592  | 2.435142  |
| C  | -4.045592 | 2.609215  | 0.000000  | H | -4.322383 | -3.342750 | -3.322716 |
| C  | -4.607592 | 3.022112  | -1.234175 | H | -3.034118 | -2.486140 | -2.446697 |
| C  | -5.714344 | 3.880189  | -1.207751 | H | -6.308227 | -4.177976 | -2.153916 |
| C  | -6.267051 | 4.315976  | 0.000000  | H | -6.308227 | -4.177976 | 2.153916  |
| C  | -5.714344 | 3.880189  | 1.207751  | H | -6.149160 | 4.212252  | 2.153779  |
| O  | -2.928785 | 1.842470  | 0.000000  | H | -6.149160 | 4.212252  | -2.153779 |
| C  | -4.025019 | 2.524824  | -2.550001 | H | -6.278320 | -2.134966 | 4.184670  |
| C  | -4.632307 | 1.215458  | -3.034746 | H | -6.190800 | 2.170667  | 4.171540  |
| C  | -4.068069 | -0.031201 | -2.653654 | H | -6.190800 | 2.170667  | -4.171540 |
| C  | -4.684569 | -1.250762 | -3.040055 | H | -6.278320 | -2.134966 | -4.184670 |
| C  | -5.812945 | -1.198993 | -3.866213 | H | -7.303454 | -4.928370 | 0.000000  |
| C  | -6.349786 | 0.020726  | -4.290153 | H | -7.126833 | 4.986997  | 0.000000  |
| C  | -5.763835 | 1.214177  | -3.859574 | H | -7.222931 | 0.040916  | 4.943445  |
| C  | -4.121027 | -2.581070 | -2.555791 | H | -7.222931 | 0.040916  | -4.943445 |
| O  | -2.902329 | -0.066097 | -1.973534 |   |           |           |           |
| O  | -2.902329 | -0.066097 | 1.973534  |   |           |           |           |
| XX | 0.000000  | 0.000000  | 0.000000  |   |           |           |           |

Table 12: Cartesian coordinates of anionic (**2**)H C<sub>s</sub> Symmetry GGA Becke Perdew / TZP-ZORA, spin singlet, equilibrium N–N distance equals 1.327 Å

| Atom | X        | Y        | Z        |
|------|----------|----------|----------|
| C    | 5.797822 | 3.848178 | 1.205506 |

|    |           |           |           |    |           |           |           |
|----|-----------|-----------|-----------|----|-----------|-----------|-----------|
| C  | 4.646428  | 3.052304  | 1.232367  | C  | -4.032930 | -0.027969 | 2.659897  |
| C  | 4.021247  | 2.700947  | 0.000000  | C  | -4.619889 | 1.215098  | 3.035376  |
| C  | 4.646428  | 3.052304  | -1.232367 | C  | -5.759960 | 1.207379  | 3.847149  |
| C  | 5.797822  | 3.848178  | -1.205506 | C  | -6.346824 | 0.011214  | 4.272978  |
| C  | 6.368323  | 4.269564  | 0.000000  | C  | -5.796299 | -1.204869 | 3.852393  |
| C  | 4.078456  | 2.557320  | 2.556958  | C  | -4.018418 | 2.526912  | 2.548830  |
| C  | 4.670357  | 1.235865  | 3.034325  | C  | -4.606623 | 3.022837  | 1.234408  |
| C  | 4.074724  | 0.005975  | 2.646197  | C  | -4.030529 | 2.618918  | 0.000000  |
| C  | 4.640114  | -1.236604 | 3.040241  | C  | -4.606623 | 3.022837  | -1.234408 |
| C  | 5.772329  | -1.221099 | 3.864561  | C  | -5.726967 | 3.862096  | -1.207632 |
| C  | 6.351814  | -0.019018 | 4.283640  | C  | -6.287686 | 4.291692  | 0.000000  |
| C  | 5.801394  | 1.196509  | 3.858775  | C  | -5.726967 | 3.862096  | 1.207632  |
| C  | 4.024574  | -2.544543 | 2.558533  | O  | -2.900818 | 1.890693  | 0.000000  |
| C  | 4.591504  | -3.042953 | 1.234912  | C  | -4.018418 | 2.526912  | -2.548830 |
| C  | 3.989263  | -2.656079 | 0.000000  | C  | -4.619889 | 1.215098  | -3.035376 |
| C  | 4.591504  | -3.042953 | -1.234912 | C  | -4.032930 | -0.027969 | -2.659897 |
| C  | 5.720395  | -3.868179 | -1.206946 | C  | -4.657071 | -1.250692 | -3.040977 |
| C  | 6.284758  | -4.299405 | 0.000000  | C  | -5.796299 | -1.204869 | -3.852393 |
| C  | 5.720395  | -3.868179 | 1.206946  | C  | -6.346824 | 0.011214  | -4.272978 |
| C  | 4.024574  | -2.544543 | -2.558533 | C  | -5.759960 | 1.207379  | -3.847149 |
| C  | 4.640114  | -1.236604 | -3.040241 | C  | -4.088069 | -2.578564 | -2.557227 |
| C  | 4.074724  | 0.005975  | -2.646197 | O  | -2.864148 | -0.050023 | -2.004246 |
| C  | 4.670357  | 1.235865  | -3.034325 | O  | -2.864148 | -0.050023 | 2.004246  |
| C  | 5.801394  | 1.196509  | -3.858775 | XX | 0.000000  | 0.000000  | 0.000000  |
| C  | 6.351814  | -0.019018 | -4.283640 | H  | 0.412718  | 1.674335  | 0.000000  |
| C  | 5.772329  | -1.221099 | -3.864561 | H  | 4.270744  | 3.320022  | 3.327102  |
| O  | 2.927792  | 0.018745  | -1.944622 | H  | 2.992786  | 2.440553  | 2.455162  |
| Nb | 2.463914  | 0.033749  | 0.000000  | H  | 4.199529  | -3.314058 | -3.325252 |
| O  | 2.839307  | 2.068359  | 0.000000  | H  | 2.941874  | -2.409609 | -2.452696 |
| C  | 4.078456  | 2.557320  | -2.556958 | H  | 4.199529  | -3.314058 | 3.325252  |
| O  | 2.838012  | -1.967386 | 0.000000  | H  | 2.941874  | -2.409609 | 2.452696  |
| O  | 2.927792  | 0.018745  | 1.944622  | H  | 4.270744  | 3.320022  | -3.327102 |
| N  | 0.549283  | 0.649820  | 0.000000  | H  | 2.992786  | 2.440553  | -2.455162 |
| N  | -0.632378 | 0.009540  | 0.000000  | H  | 6.259703  | 4.138800  | -2.153333 |
| Nb | -2.436679 | -0.074586 | 0.000000  | H  | 6.259703  | 4.138800  | 2.153333  |
| O  | -2.881364 | -2.049969 | 0.000000  | H  | 7.258721  | 4.901019  | 0.000000  |
| C  | -4.067986 | -2.686484 | 0.000000  | H  | 6.171603  | -4.175499 | 2.154933  |
| C  | -4.676639 | -3.051918 | 1.234035  | H  | 6.171603  | -4.175499 | -2.154933 |
| C  | -5.830348 | -3.845153 | 1.206371  | H  | 7.162639  | -4.948074 | 0.000000  |
| C  | -6.404447 | -4.258523 | 0.000000  | H  | 6.260049  | 2.138104  | 4.172937  |
| C  | -5.830348 | -3.845153 | -1.206371 | H  | 6.208020  | -2.172614 | 4.181612  |
| C  | -4.676639 | -3.051918 | -1.234035 | H  | 7.230983  | -0.028396 | 4.930730  |
| C  | -4.088069 | -2.578564 | 2.557227  | H  | 6.208020  | -2.172614 | -4.181612 |
| C  | -4.657071 | -1.250692 | 3.040977  | H  | 6.260049  | 2.138104  | -4.172937 |

|   |           |           |           |
|---|-----------|-----------|-----------|
| H | 7.230983  | -0.028396 | -4.930730 |
| H | -4.289870 | -3.344578 | 3.321527  |
| H | -3.001355 | -2.479639 | 2.449069  |
| H | -4.185922 | 3.296013  | -3.317973 |
| H | -2.936937 | 2.394785  | -2.426411 |
| H | -4.185922 | 3.296013  | 3.317973  |
| H | -2.936937 | 2.394785  | 2.426411  |
| H | -4.289870 | -3.344578 | -3.321527 |
| H | -3.001355 | -2.479639 | -2.449069 |
| H | -6.286901 | -4.144204 | -2.154086 |
| H | -6.286901 | -4.144204 | 2.154086  |
| H | -6.168989 | 4.183119  | 2.154999  |
| H | -6.168989 | 4.183119  | -2.154999 |
| H | -6.263317 | -2.144597 | 4.160554  |
| H | -6.197850 | 2.163168  | 4.148989  |
| H | -6.197850 | 2.163168  | -4.148989 |
| H | -6.263317 | -2.144597 | -4.160554 |
| H | -7.297328 | -4.886589 | 0.000000  |
| H | -7.160582 | 4.947111  | 0.000000  |
| H | -7.230641 | 0.026885  | 4.913339  |
| H | -7.230641 | 0.026885  | -4.913339 |

## 2.6 Extra geometries

Table 13: Cartesian coordinates of  $\mu^2\text{-N}_2[\text{Nb}(\text{OH})_4]_2$   $D_{4h}$  Symmetry GGA Becke Perdew / TZ2P-ZORA, spin singlet, equilibrium N–N distance equals 1.279 Å

| Atom | X         | Y         | Z         |
|------|-----------|-----------|-----------|
| N    | 0.000000  | 0.000000  | -0.639688 |
| N    | 0.000000  | 0.000000  | 0.639688  |
| Nb   | 0.000000  | 0.000000  | -2.451152 |
| Nb   | 0.000000  | 0.000000  | 2.451152  |
| O    | -1.993511 | 0.000000  | 2.964541  |
| O    | 1.993511  | 0.000000  | 2.964541  |
| O    | -1.993511 | 0.000000  | -2.964541 |
| O    | 1.993511  | 0.000000  | -2.964541 |
| O    | 0.000000  | -1.993511 | 2.964541  |
| O    | 0.000000  | 1.993511  | 2.964541  |
| O    | 0.000000  | -1.993511 | -2.964541 |
| O    | 0.000000  | 1.993511  | -2.964541 |
| H    | 2.163114  | 0.000000  | 3.920591  |
| H    | -2.163114 | 0.000000  | 3.920591  |
| H    | -2.163114 | 0.000000  | -3.920591 |
| H    | 2.163114  | 0.000000  | -3.920591 |
| H    | 0.000000  | 2.163114  | -3.920591 |

|   |          |           |           |
|---|----------|-----------|-----------|
| H | 0.000000 | -2.163114 | -3.920591 |
| H | 0.000000 | 2.163114  | 3.920591  |
| H | 0.000000 | -2.163114 | 3.920591  |

Table 14: Cartesian coordinates of  $\mu^2\text{-N}_2[\text{Nb}(\text{OCH}_3)_4]_2$   $D_{4h}$  Symmetry GGA Becke Perdew / TZ2P-ZORA, spin singlet, equilibrium N–N distance equals 1.280 Å

| Atom | X         | Y         | Z         |
|------|-----------|-----------|-----------|
| N    | 0.000000  | 0.000000  | 0.635881  |
| N    | 0.000000  | 0.000000  | -0.635881 |
| Nb   | 0.000000  | 0.000000  | 2.454523  |
| Nb   | 0.000000  | 0.000000  | -2.454523 |
| O    | 0.000000  | 1.988968  | 2.949974  |
| O    | 0.000000  | -1.988968 | 2.949974  |
| O    | 0.000000  | 1.988968  | -2.949974 |
| O    | 0.000000  | -1.988968 | -2.949974 |
| O    | -1.988968 | 0.000000  | -2.949974 |
| O    | 1.988968  | 0.000000  | -2.949974 |
| O    | -1.988968 | 0.000000  | 2.949974  |
| O    | 1.988968  | 0.000000  | 2.949974  |
| H    | 0.000000  | 1.792352  | 5.051505  |
| H    | 0.000000  | -1.792352 | 5.051505  |
| H    | 0.000000  | 1.792352  | -5.051505 |
| H    | 0.000000  | -1.792352 | -5.051505 |
| H    | -3.180377 | 0.894147  | -4.392058 |
| H    | 3.180377  | 0.894147  | -4.392058 |
| H    | -1.792352 | 0.000000  | 5.051505  |
| H    | 1.792352  | 0.000000  | 5.051505  |
| C    | 2.537015  | 0.000000  | 4.216048  |
| H    | 3.180377  | -0.894147 | 4.392058  |
| H    | 3.180377  | 0.894147  | 4.392058  |
| C    | -2.537015 | 0.000000  | 4.216048  |
| H    | -3.180377 | 0.894147  | 4.392058  |
| H    | -3.180377 | -0.894147 | 4.392058  |
| C    | 2.537015  | 0.000000  | -4.216048 |
| H    | 3.180377  | -0.894147 | -4.392058 |
| H    | 1.792352  | 0.000000  | -5.051505 |
| C    | -2.537015 | 0.000000  | -4.216048 |
| H    | -1.792352 | 0.000000  | -5.051505 |
| H    | -3.180377 | -0.894147 | -4.392058 |
| C    | 0.000000  | -2.537015 | -4.216048 |
| H    | 0.894147  | -3.180377 | -4.392058 |
| H    | -0.894147 | -3.180377 | -4.392058 |

|   |           |           |           |
|---|-----------|-----------|-----------|
| C | 0.000000  | 2.537015  | -4.216048 |
| H | -0.894147 | 3.180377  | -4.392058 |
| H | 0.894147  | 3.180377  | -4.392058 |
| C | 0.000000  | -2.537015 | 4.216048  |
| H | -0.894147 | -3.180377 | 4.392058  |
| H | 0.894147  | -3.180377 | 4.392058  |
| C | 0.000000  | 2.537015  | 4.216048  |
| H | 0.894147  | 3.180377  | 4.392058  |
| H | -0.894147 | 3.180377  | 4.392058  |

## 2.7 GAUSSIAN auxiliary geometries

Table 15: Cartesian coordinates of (**2**)  $D_{4d}$  Symmetry B3LYP / SDDall, spin singlet, equilibrium N–N distance equals 1.283 Å

| Atom | X         | Y         | Z        |
|------|-----------|-----------|----------|
| N    | 0.000000  | 0.000000  | 0.641339 |
| Nb   | 0.000000  | 0.000000  | 2.456983 |
| O    | 0.000000  | 1.949699  | 3.025147 |
| O    | -1.949699 | 0.000000  | 3.025147 |
| O    | 0.000000  | -1.949699 | 3.025147 |
| O    | 1.949699  | 0.000000  | 3.025147 |
| C    | 0.000000  | 2.665261  | 4.185181 |
| C    | 1.233184  | 3.043839  | 4.777523 |
| C    | 1.208195  | 3.850427  | 5.923806 |
| C    | 0.000000  | 4.264426  | 6.496377 |
| C    | -1.208195 | 3.850427  | 5.923806 |
| C    | -1.233184 | 3.043839  | 4.777523 |
| C    | 0.000000  | -2.665261 | 4.185181 |
| C    | -1.233184 | -3.043839 | 4.777523 |
| C    | -1.208195 | -3.850427 | 5.923806 |
| C    | 0.000000  | -4.264426 | 6.496377 |
| C    | 1.208195  | -3.850427 | 5.923806 |
| C    | 1.233184  | -3.043839 | 4.777523 |
| C    | -2.665261 | 0.000000  | 4.185181 |
| C    | -3.043839 | 1.233184  | 4.777523 |
| C    | -3.850427 | 1.208195  | 5.923806 |
| C    | -4.264426 | 0.000000  | 6.496377 |
| C    | -3.850427 | -1.208195 | 5.923806 |
| C    | -3.043839 | -1.233184 | 4.777523 |
| C    | 2.665261  | 0.000000  | 4.185181 |
| C    | 3.043839  | -1.233184 | 4.777523 |
| C    | 3.850427  | -1.208195 | 5.923806 |
| C    | 4.264426  | 0.000000  | 6.496377 |
| C    | 3.850427  | 1.208195  | 5.923806 |

|    |           |           |           |
|----|-----------|-----------|-----------|
| C  | 3.043839  | 1.233184  | 4.777523  |
| C  | -2.557642 | 2.557642  | 4.191210  |
| C  | -2.557642 | -2.557642 | 4.191210  |
| C  | 2.557642  | -2.557642 | 4.191210  |
| C  | 2.557642  | 2.557642  | 4.191210  |
| H  | -3.321296 | 3.321296  | 4.384663  |
| H  | -2.449979 | 2.449979  | 3.108752  |
| H  | 3.321296  | -3.321296 | 4.384663  |
| H  | 2.449979  | -2.449979 | 3.108752  |
| H  | -3.321296 | -3.321296 | 4.384663  |
| H  | -2.449979 | -2.449979 | 3.108752  |
| H  | 3.321296  | 3.321296  | 4.384663  |
| H  | 2.449979  | 2.449979  | 3.108752  |
| H  | 2.151586  | 4.152738  | 6.373502  |
| H  | -2.151586 | 4.152738  | 6.373502  |
| H  | 0.000000  | 4.894872  | 7.381438  |
| H  | -2.151586 | -4.152738 | 6.373502  |
| H  | 2.151586  | -4.152738 | 6.373502  |
| H  | 0.000000  | -4.894872 | 7.381438  |
| H  | -4.152738 | 2.151586  | 6.373502  |
| H  | -4.152738 | -2.151586 | 6.373502  |
| H  | -4.894872 | 0.000000  | 7.381438  |
| H  | 4.152738  | -2.151586 | 6.373502  |
| H  | 4.152738  | 2.151586  | 6.373502  |
| H  | 4.894872  | 0.000000  | 7.381438  |
| N  | 0.000000  | 0.000000  | -0.641339 |
| Nb | 0.000000  | 0.000000  | -2.456983 |
| O  | 1.378646  | 1.378646  | -3.025147 |
| O  | 1.378646  | -1.378646 | -3.025147 |
| O  | -1.378646 | -1.378646 | -3.025147 |
| O  | -1.378646 | 1.378646  | -3.025147 |
| C  | 1.884624  | 1.884624  | -4.185181 |
| C  | 1.280327  | 3.024312  | -4.777523 |
| C  | 1.868341  | 3.576986  | -5.923806 |
| C  | 3.015404  | 3.015404  | -6.496377 |
| C  | 3.576986  | 1.868341  | -5.923806 |
| C  | 3.024312  | 1.280327  | -4.777523 |
| C  | -1.884624 | -1.884624 | -4.185181 |
| C  | -1.280327 | -3.024312 | -4.777523 |
| C  | -1.868341 | -3.576986 | -5.923806 |
| C  | -3.015404 | -3.015404 | -6.496377 |
| C  | -3.576986 | -1.868341 | -5.923806 |
| C  | -3.024312 | -1.280327 | -4.777523 |
| C  | 1.884624  | -1.884624 | -4.185181 |

|   |           |           |           |
|---|-----------|-----------|-----------|
| C | 3.024312  | -1.280327 | -4.777523 |
| C | 3.576986  | -1.868341 | -5.923806 |
| C | 3.015404  | -3.015404 | -6.496377 |
| C | 1.868341  | -3.576986 | -5.923806 |
| C | 1.280327  | -3.024312 | -4.777523 |
| C | -1.884624 | 1.884624  | -4.185181 |
| C | -3.024312 | 1.280327  | -4.777523 |
| C | -3.576986 | 1.868341  | -5.923806 |
| C | -3.015404 | 3.015404  | -6.496377 |
| C | -1.868341 | 3.576986  | -5.923806 |
| C | -1.280327 | 3.024312  | -4.777523 |
| C | 3.617053  | 0.000000  | -4.191210 |
| C | 0.000000  | -3.617053 | -4.191210 |
| C | -3.617053 | 0.000000  | -4.191210 |
| C | 0.000000  | 3.617053  | -4.191210 |
| H | 4.697022  | 0.000000  | -4.384663 |
| H | 3.464793  | 0.000000  | -3.108752 |
| H | -4.697022 | 0.000000  | -4.384663 |
| H | -3.464793 | 0.000000  | -3.108752 |
| H | 0.000000  | -4.697022 | -4.384663 |
| H | 0.000000  | -3.464793 | -3.108752 |
| H | 0.000000  | 4.697022  | -4.384663 |
| H | 0.000000  | 3.464793  | -3.108752 |
| H | 1.415028  | 4.457830  | -6.373502 |
| H | 4.457830  | 1.415028  | -6.373502 |
| H | -1.415028 | -4.457830 | -6.373502 |
| H | -4.457830 | -1.415028 | -6.373502 |
| H | 4.457830  | -1.415028 | -6.373502 |
| H | 1.415028  | -4.457830 | -6.373502 |
| H | -4.457830 | 1.415028  | -6.373502 |
| H | -1.415028 | 4.457830  | -6.373502 |
| H | 3.461197  | 3.461197  | -7.381438 |
| H | -3.461197 | -3.461197 | -7.381438 |
| H | 3.461197  | -3.461197 | -7.381438 |
| H | -3.461197 | 3.461197  | -7.381438 |

Table 16: Cartesian coordinates of **(2)**  $D_{4h}$  Symmetry  $\omega$ B97XD / SDDAll, spin singlet, equilibrium N–N distance equals 1.292 Å

| Atom | X         | Y        | Z         |
|------|-----------|----------|-----------|
| Nb   | 0.000000  | 0.000000 | 2.428272  |
| Nb   | 0.000000  | 0.000000 | -2.428272 |
| N    | 0.000000  | 0.000000 | -0.645906 |
| N    | 0.000000  | 0.000000 | 0.645906  |
| C    | 1.227167  | 3.017564 | -4.741998 |
| C    | 0.000000  | 2.647333 | -4.146569 |
| C    | -1.227167 | 3.017564 | -4.741998 |

|   |           |           |           |
|---|-----------|-----------|-----------|
| C | -1.204951 | 3.787575  | -5.908529 |
| C | 0.000000  | 4.182093  | -6.493882 |
| C | 1.204951  | 3.787575  | -5.908529 |
| O | -1.943127 | 0.000000  | -2.988907 |
| O | 0.000000  | 1.943127  | -2.988907 |
| C | -2.647333 | 0.000000  | -4.146569 |
| C | -3.017564 | -1.227167 | -4.741998 |
| C | -3.787575 | -1.204951 | -5.908529 |
| C | -4.182093 | 0.000000  | -6.493882 |
| C | -3.787575 | 1.204951  | -5.908529 |
| C | -3.017564 | 1.227167  | -4.741998 |
| C | -2.542371 | -2.542371 | -4.144918 |
| C | -1.227167 | -3.017564 | -4.741998 |
| C | 0.000000  | -2.647333 | -4.146569 |
| C | 1.227167  | -3.017564 | -4.741998 |
| C | 1.204951  | -3.787575 | -5.908529 |
| C | 0.000000  | -4.182093 | -6.493882 |
| C | -1.204951 | -3.787575 | -5.908529 |
| C | -2.542371 | 2.542371  | -4.144918 |
| O | 0.000000  | -1.943127 | -2.988907 |
| C | 2.542371  | -2.542371 | -4.144918 |
| C | 3.017564  | -1.227167 | -4.741998 |
| C | 2.647333  | 0.000000  | -4.146569 |
| C | 3.017564  | 1.227167  | -4.741998 |
| C | 3.787575  | 1.204951  | -5.908529 |
| C | 4.182093  | 0.000000  | -6.493882 |
| C | 3.787575  | -1.204951 | -5.908529 |
| O | 1.943127  | 0.000000  | -2.988907 |
| C | 2.542371  | 2.542371  | -4.144918 |
| H | 0.000000  | -4.781623 | -7.400325 |
| H | 0.000000  | 4.781623  | -7.400325 |
| O | 0.000000  | 1.943127  | 2.988907  |
| C | 0.000000  | 2.647333  | 4.146569  |
| C | 1.227167  | 3.017564  | 4.741998  |
| C | 1.204951  | 3.787575  | 5.908529  |
| C | 0.000000  | 4.182093  | 6.493882  |
| C | -1.204951 | 3.787575  | 5.908529  |
| C | -1.227167 | 3.017564  | 4.741998  |
| C | 2.542371  | 2.542371  | 4.144918  |
| C | 3.017564  | 1.227167  | 4.741998  |
| C | 2.647333  | 0.000000  | 4.146569  |
| C | 3.017564  | -1.227167 | 4.741998  |
| C | 3.787575  | -1.204951 | 5.908529  |
| C | 4.182093  | 0.000000  | 6.493882  |

|   |           |           |           |
|---|-----------|-----------|-----------|
| C | 3.787575  | 1.204951  | 5.908529  |
| O | 1.943127  | 0.000000  | 2.988907  |
| C | 2.542371  | -2.542371 | 4.144918  |
| C | 1.227167  | -3.017564 | 4.741998  |
| C | 0.000000  | -2.647333 | 4.146569  |
| C | -1.227167 | -3.017564 | 4.741998  |
| C | -1.204951 | -3.787575 | 5.908529  |
| C | 0.000000  | -4.182093 | 6.493882  |
| C | 1.204951  | -3.787575 | 5.908529  |
| O | 0.000000  | -1.943127 | 2.988907  |
| C | -2.542371 | -2.542371 | 4.144918  |
| C | -3.017564 | -1.227167 | 4.741998  |
| C | -2.647333 | 0.000000  | 4.146569  |
| C | -3.017564 | 1.227167  | 4.741998  |
| C | -3.787575 | 1.204951  | 5.908529  |
| C | -4.182093 | 0.000000  | 6.493882  |
| C | -3.787575 | -1.204951 | 5.908529  |
| O | -1.943127 | 0.000000  | 2.988907  |
| C | -2.542371 | 2.542371  | 4.144918  |
| H | -3.307727 | -3.307727 | 4.324449  |
| H | -2.424261 | -2.424261 | 3.063956  |
| H | 3.307727  | 3.307727  | 4.324449  |
| H | 2.424261  | 2.424261  | 3.063956  |
| H | 3.307727  | -3.307727 | 4.324449  |
| H | 2.424261  | -2.424261 | 3.063956  |
| H | -3.307727 | 3.307727  | 4.324449  |
| H | -2.424261 | 2.424261  | 3.063956  |
| H | -4.073082 | 2.150202  | 6.365968  |
| H | -4.073082 | -2.150202 | 6.365968  |
| H | -4.781623 | 0.000000  | 7.400325  |
| H | 4.073082  | -2.150202 | 6.365968  |
| H | 4.073082  | 2.150202  | 6.365968  |
| H | 4.781623  | 0.000000  | 7.400325  |
| H | -2.150202 | -4.073082 | 6.365968  |
| H | 2.150202  | -4.073082 | 6.365968  |
| H | 0.000000  | -4.781623 | 7.400325  |
| H | 2.150202  | 4.073082  | 6.365968  |
| H | -2.150202 | 4.073082  | 6.365968  |
| H | 0.000000  | 4.781623  | 7.400325  |
| H | 3.307727  | -3.307727 | -4.324449 |
| H | 2.424261  | -2.424261 | -3.063956 |
| H | -3.307727 | 3.307727  | -4.324449 |
| H | -2.424261 | 2.424261  | -3.063956 |
| H | -3.307727 | -3.307727 | -4.324449 |

|   |           |           |           |
|---|-----------|-----------|-----------|
| H | -2.424261 | -2.424261 | -3.063956 |
| H | 3.307727  | 3.307727  | -4.324449 |
| H | 2.424261  | 2.424261  | -3.063956 |
| H | 4.073082  | 2.150202  | -6.365968 |
| H | 4.073082  | -2.150202 | -6.365968 |
| H | -4.073082 | -2.150202 | -6.365968 |
| H | -4.073082 | 2.150202  | -6.365968 |
| H | 2.150202  | -4.073082 | -6.365968 |
| H | -2.150202 | -4.073082 | -6.365968 |
| H | -2.150202 | 4.073082  | -6.365968 |
| H | 2.150202  | 4.073082  | -6.365968 |
| H | 4.781623  | 0.000000  | -7.400325 |
| H | -4.781623 | 0.000000  | -7.400325 |

Table 17: Cartesian coordinates of **(2)**  $D_{4h}$  Symmetry LC- $\omega$ PBE / SDDAll, spin singlet, equilibrium N–N distance equals 1.301 Å

| Atom | X         | Y         | Z         |
|------|-----------|-----------|-----------|
| Nb   | 0.000000  | 0.000000  | 2.418956  |
| Nb   | 0.000000  | 0.000000  | -2.418956 |
| N    | 0.000000  | 0.000000  | -0.650527 |
| N    | 0.000000  | 0.000000  | 0.650527  |
| C    | 1.222769  | 3.009405  | -4.738900 |
| C    | 0.000000  | 2.636904  | -4.149742 |
| C    | -1.222769 | 3.009405  | -4.738900 |
| C    | -1.200987 | 3.795617  | -5.888608 |
| C    | 0.000000  | 4.199050  | -6.464334 |
| C    | 1.200987  | 3.795617  | -5.888608 |
| O    | -1.923676 | 0.000000  | -3.002503 |
| O    | 0.000000  | 1.923676  | -3.002503 |
| C    | -2.636904 | 0.000000  | -4.149742 |
| C    | -3.009405 | -1.222769 | -4.738900 |
| C    | -3.795617 | -1.200987 | -5.888608 |
| C    | -4.199050 | 0.000000  | -6.464334 |
| C    | -3.795617 | 1.200987  | -5.888608 |
| C    | -3.009405 | 1.222769  | -4.738900 |
| C    | -2.530294 | -2.530294 | -4.142488 |
| C    | -1.222769 | -3.009405 | -4.738900 |
| C    | 0.000000  | -2.636904 | -4.149742 |
| C    | 1.222769  | -3.009405 | -4.738900 |
| C    | 1.200987  | -3.795617 | -5.888608 |
| C    | 0.000000  | -4.199050 | -6.464334 |
| C    | -1.200987 | -3.795617 | -5.888608 |
| C    | -2.530294 | 2.530294  | -4.142488 |
| O    | 0.000000  | -1.923676 | -3.002503 |



|   |           |           |           |   |           |           |           |
|---|-----------|-----------|-----------|---|-----------|-----------|-----------|
| C | 2.530294  | -2.530294 | -4.142488 | H | -2.403238 | -2.403238 | 3.064830  |
| C | 3.009405  | -1.222769 | -4.738900 | H | 3.295406  | 3.295406  | 4.309737  |
| C | 2.636904  | 0.000000  | -4.149742 | H | 2.403238  | 2.403238  | 3.064830  |
| C | 3.009405  | 1.222769  | -4.738900 | H | 3.295406  | -3.295406 | 4.309737  |
| C | 3.795617  | 1.200987  | -5.888608 | H | 2.403238  | -2.403238 | 3.064830  |
| C | 4.199050  | 0.000000  | -6.464334 | H | -3.295406 | 3.295406  | 4.309737  |
| C | 3.795617  | -1.200987 | -5.888608 | H | -2.403238 | 2.403238  | 3.064830  |
| O | 1.923676  | 0.000000  | -3.002503 | H | -4.090666 | 2.145154  | 6.339723  |
| C | 2.530294  | 2.530294  | -4.142488 | H | -4.090666 | -2.145154 | 6.339723  |
| H | 0.000000  | -4.814563 | -7.358550 | H | -4.814563 | 0.000000  | 7.358550  |
| H | 0.000000  | 4.814563  | -7.358550 | H | 4.090666  | -2.145154 | 6.339723  |
| O | 0.000000  | 1.923676  | 3.002503  | H | 4.090666  | 2.145154  | 6.339723  |
| C | 0.000000  | 2.636904  | 4.149742  | H | 4.814563  | 0.000000  | 7.358550  |
| C | 1.222769  | 3.009405  | 4.738900  | H | -2.145154 | -4.090666 | 6.339723  |
| C | 1.200987  | 3.795617  | 5.888608  | H | 2.145154  | -4.090666 | 6.339723  |
| C | 0.000000  | 4.199050  | 6.464334  | H | 0.000000  | -4.814563 | 7.358550  |
| C | -1.200987 | 3.795617  | 5.888608  | H | 2.145154  | 4.090666  | 6.339723  |
| C | -1.222769 | 3.009405  | 4.738900  | H | -2.145154 | 4.090666  | 6.339723  |
| C | 2.530294  | 2.530294  | 4.142488  | H | 0.000000  | 4.814563  | 7.358550  |
| C | 3.009405  | 1.222769  | 4.738900  | H | 3.295406  | -3.295406 | -4.309737 |
| C | 2.636904  | 0.000000  | 4.149742  | H | 2.403238  | -2.403238 | -3.064830 |
| C | 3.009405  | -1.222769 | 4.738900  | H | -3.295406 | 3.295406  | -4.309737 |
| C | 3.795617  | -1.200987 | 5.888608  | H | -2.403238 | 2.403238  | -3.064830 |
| C | 4.199050  | 0.000000  | 6.464334  | H | -3.295406 | -3.295406 | -4.309737 |
| C | 3.795617  | 1.200987  | 5.888608  | H | -2.403238 | -2.403238 | -3.064830 |
| O | 1.923676  | 0.000000  | 3.002503  | H | 3.295406  | 3.295406  | -4.309737 |
| C | 2.530294  | -2.530294 | 4.142488  | H | 2.403238  | 2.403238  | -3.064830 |
| C | 1.222769  | -3.009405 | 4.738900  | H | 4.090666  | 2.145154  | -6.339723 |
| C | 0.000000  | -2.636904 | 4.149742  | H | 4.090666  | -2.145154 | -6.339723 |
| C | -1.222769 | -3.009405 | 4.738900  | H | -4.090666 | -2.145154 | -6.339723 |
| C | -1.200987 | -3.795617 | 5.888608  | H | -4.090666 | 2.145154  | -6.339723 |
| C | 0.000000  | -4.199050 | 6.464334  | H | 2.145154  | -4.090666 | -6.339723 |
| C | 1.200987  | -3.795617 | 5.888608  | H | -2.145154 | -4.090666 | -6.339723 |
| O | 0.000000  | -1.923676 | 3.002503  | H | -2.145154 | 4.090666  | -6.339723 |
| C | -2.530294 | -2.530294 | 4.142488  | H | 2.145154  | 4.090666  | -6.339723 |
| C | -3.009405 | -1.222769 | 4.738900  | H | 4.814563  | 0.000000  | -7.358550 |
| C | -2.636904 | 0.000000  | 4.149742  | H | -4.814563 | 0.000000  | -7.358550 |
| C | -3.009405 | 1.222769  | 4.738900  |   |           |           |           |
| C | -3.795617 | 1.200987  | 5.888608  |   |           |           |           |
| C | -4.199050 | 0.000000  | 6.464334  |   |           |           |           |
| C | -3.795617 | -1.200987 | 5.888608  |   |           |           |           |
| O | -1.923676 | 0.000000  | 3.002503  |   |           |           |           |
| C | -2.530294 | 2.530294  | 4.142488  |   |           |           |           |
| H | -3.295406 | -3.295406 | 4.309737  |   |           |           |           |

Table 18: Cartesian coordinates of **(2)**  $D_{4h}$  Symmetry CAM-B3LYP / SDDAll, spin singlet, equilibrium N–N distance equals 1.296 Å

| Atom | X        | Y        | Z         |
|------|----------|----------|-----------|
| Nb   | 0.000000 | 0.000000 | 2.438687  |
| Nb   | 0.000000 | 0.000000 | -2.438687 |
| N    | 0.000000 | 0.000000 | -0.647911 |
| N    | 0.000000 | 0.000000 | 0.647911  |
| C    | 1.227523 | 3.028916 | -4.761753 |



|   |           |           |           |   |           |           |           |
|---|-----------|-----------|-----------|---|-----------|-----------|-----------|
| C | 0.000000  | 2.651961  | -4.173109 | C | 3.827912  | -1.204447 | 5.907760  |
| C | -1.227523 | 3.028916  | -4.761753 | C | 4.237803  | 0.000000  | 6.481154  |
| C | -1.204447 | 3.827912  | -5.907760 | C | 3.827912  | 1.204447  | 5.907760  |
| C | 0.000000  | 4.237803  | -6.481154 | O | 1.932204  | 0.000000  | 3.021172  |
| C | 1.204447  | 3.827912  | -5.907760 | C | 2.544461  | -2.544461 | 4.171382  |
| O | -1.932204 | 0.000000  | -3.021172 | C | 1.227523  | -3.028916 | 4.761753  |
| O | 0.000000  | 1.932204  | -3.021172 | C | 0.000000  | -2.651961 | 4.173109  |
| C | -2.651961 | 0.000000  | -4.173109 | C | -1.227523 | -3.028916 | 4.761753  |
| C | -3.028916 | -1.227523 | -4.761753 | C | -1.204447 | -3.827912 | 5.907760  |
| C | -3.827912 | -1.204447 | -5.907760 | C | 0.000000  | -4.237803 | 6.481154  |
| C | -4.237803 | 0.000000  | -6.481154 | C | 1.204447  | -3.827912 | 5.907760  |
| C | -3.827912 | 1.204447  | -5.907760 | O | 0.000000  | -1.932204 | 3.021172  |
| C | -3.028916 | 1.227523  | -4.761753 | C | -2.544461 | -2.544461 | 4.171382  |
| C | -2.544461 | -2.544461 | -4.171382 | C | -3.028916 | -1.227523 | 4.761753  |
| C | -1.227523 | -3.028916 | -4.761753 | C | -2.651961 | 0.000000  | 4.173109  |
| C | 0.000000  | -2.651961 | -4.173109 | C | -3.028916 | 1.227523  | 4.761753  |
| C | 1.227523  | -3.028916 | -4.761753 | C | -3.827912 | 1.204447  | 5.907760  |
| C | 1.204447  | -3.827912 | -5.907760 | C | -4.237803 | 0.000000  | 6.481154  |
| C | 0.000000  | -4.237803 | -6.481154 | C | -3.827912 | -1.204447 | 5.907760  |
| C | -1.204447 | -3.827912 | -5.907760 | O | -1.932204 | 0.000000  | 3.021172  |
| C | -2.544461 | 2.544461  | -4.171382 | C | -2.544461 | 2.544461  | 4.171382  |
| O | 0.000000  | -1.932204 | -3.021172 | H | -3.308901 | -3.308901 | 4.354258  |
| C | 2.544461  | -2.544461 | -4.171382 | H | -2.427876 | -2.427876 | 3.091131  |
| C | 3.028916  | -1.227523 | -4.761753 | H | 3.308901  | 3.308901  | 4.354258  |
| C | 2.651961  | 0.000000  | -4.173109 | H | 2.427876  | 2.427876  | 3.091131  |
| C | 3.028916  | 1.227523  | -4.761753 | H | 3.308901  | -3.308901 | 4.354258  |
| C | 3.827912  | 1.204447  | -5.907760 | H | 2.427876  | -2.427876 | 3.091131  |
| C | 4.237803  | 0.000000  | -6.481154 | H | -3.308901 | 3.308901  | 4.354258  |
| C | 3.827912  | -1.204447 | -5.907760 | H | -2.427876 | 2.427876  | 3.091131  |
| O | 1.932204  | 0.000000  | -3.021172 | H | -4.127205 | 2.148688  | 6.356857  |
| C | 2.544461  | 2.544461  | -4.171382 | H | -4.127205 | -2.148688 | 6.356857  |
| H | 0.000000  | -4.862685 | -7.369531 | H | -4.862685 | 0.000000  | 7.369531  |
| H | 0.000000  | 4.862685  | -7.369531 | H | 4.127205  | -2.148688 | 6.356857  |
| O | 0.000000  | 1.932204  | 3.021172  | H | 4.127205  | 2.148688  | 6.356857  |
| C | 0.000000  | 2.651961  | 4.173109  | H | 4.862685  | 0.000000  | 7.369531  |
| C | 1.227523  | 3.028916  | 4.761753  | H | -2.148688 | -4.127205 | 6.356857  |
| C | 1.204447  | 3.827912  | 5.907760  | H | 2.148688  | -4.127205 | 6.356857  |
| C | 0.000000  | 4.237803  | 6.481154  | H | 0.000000  | -4.862685 | 7.369531  |
| C | -1.204447 | 3.827912  | 5.907760  | H | 2.148688  | 4.127205  | 6.356857  |
| C | -1.227523 | 3.028916  | 4.761753  | H | -2.148688 | 4.127205  | 6.356857  |
| C | 2.544461  | 2.544461  | 4.171382  | H | 0.000000  | 4.862685  | 7.369531  |
| C | 3.028916  | 1.227523  | 4.761753  | H | 3.308901  | -3.308901 | -4.354258 |
| C | 2.651961  | 0.000000  | 4.173109  | H | 2.427876  | -2.427876 | -3.091131 |
| C | 3.028916  | -1.227523 | 4.761753  | H | -3.308901 | 3.308901  | -4.354258 |

|   |           |           |           |   |           |           |           |
|---|-----------|-----------|-----------|---|-----------|-----------|-----------|
| H | -2.427876 | 2.427876  | -3.091131 | C | -2.534935 | 2.534935  | -4.147953 |
| H | -3.308901 | -3.308901 | -4.354258 | O | 0.000000  | -1.934264 | -3.001648 |
| H | -2.427876 | -2.427876 | -3.091131 | C | 2.534935  | -2.534935 | -4.147953 |
| H | 3.308901  | 3.308901  | -4.354258 | C | 3.010851  | -1.224971 | -4.746080 |
| H | 2.427876  | 2.427876  | -3.091131 | C | 2.636740  | 0.000000  | -4.149841 |
| H | 4.127205  | 2.148688  | -6.356857 | C | 3.010851  | 1.224971  | -4.746080 |
| H | 4.127205  | -2.148688 | -6.356857 | C | 3.784110  | 1.204068  | -5.909091 |
| H | -4.127205 | -2.148688 | -6.356857 | C | 4.180792  | 0.000000  | -6.492828 |
| H | -4.127205 | 2.148688  | -6.356857 | C | 3.784110  | -1.204068 | -5.909091 |
| H | 2.148688  | -4.127205 | -6.356857 | O | 1.934264  | 0.000000  | -3.001648 |
| H | -2.148688 | 4.127205  | -6.356857 | C | 2.534935  | 2.534935  | -4.147953 |
| H | -2.148688 | 4.127205  | -6.356857 | H | 0.000000  | -4.784521 | -7.394232 |
| H | 2.148688  | 4.127205  | -6.356857 | H | 0.000000  | 4.784521  | -7.394232 |
| H | 4.862685  | 0.000000  | -7.369531 | O | 0.000000  | 1.934264  | 3.001648  |
| H | -4.862685 | 0.000000  | -7.369531 | C | 0.000000  | 2.636740  | 4.149841  |

Table 19: Cartesian coordinates of (**2**)  $D_{4h}$  Symmetry M062X / SDDAll, spin singlet, equilibrium N–N distance equals 1.284 Å

| Atom | X         | Y         | Z         |
|------|-----------|-----------|-----------|
| Nb   | 0.000000  | 0.000000  | 2.418886  |
| Nb   | 0.000000  | 0.000000  | -2.418886 |
| N    | 0.000000  | 0.000000  | -0.641917 |
| N    | 0.000000  | 0.000000  | 0.641917  |
| C    | 1.224971  | 3.010851  | -4.746080 |
| C    | 0.000000  | 2.636740  | -4.149841 |
| C    | -1.224971 | 3.010851  | -4.746080 |
| C    | -1.204068 | 3.784110  | -5.909091 |
| C    | 0.000000  | 4.180792  | -6.492828 |
| C    | 1.204068  | 3.784110  | -5.909091 |
| O    | -1.934264 | 0.000000  | -3.001648 |
| O    | 0.000000  | 1.934264  | -3.001648 |
| C    | -2.636740 | 0.000000  | -4.149841 |
| C    | -3.010851 | -1.224971 | -4.746080 |
| C    | -3.784110 | -1.204068 | -5.909091 |
| C    | -4.180792 | 0.000000  | -6.492828 |
| C    | -3.784110 | 1.204068  | -5.909091 |
| C    | -3.010851 | 1.224971  | -4.746080 |
| C    | -2.534935 | -2.534935 | -4.147953 |
| C    | -1.224971 | -3.010851 | -4.746080 |
| C    | 0.000000  | -2.636740 | -4.149841 |
| C    | -1.224971 | -3.010851 | 4.746080  |
| C    | -1.204068 | -3.784110 | 5.909091  |
| C    | 0.000000  | -4.180792 | 6.492828  |
| C    | 1.204068  | -3.784110 | 5.909091  |
| O    | 0.000000  | -1.934264 | 3.001648  |
| C    | -2.534935 | -2.534935 | 4.147953  |
| C    | -3.010851 | -1.224971 | 4.746080  |
| C    | -2.636740 | 0.000000  | 4.149841  |
| C    | -3.010851 | 1.224971  | 4.746080  |
| C    | -3.784110 | 1.204068  | 5.909091  |
| C    | -4.180792 | 0.000000  | 6.492828  |
| C    | -3.784110 | -1.204068 | 5.909091  |
| O    | -1.934264 | 0.000000  | 3.001648  |

|   |           |           |           |
|---|-----------|-----------|-----------|
| C | -2.534935 | 2.534935  | 4.147953  |
| H | -3.299245 | -3.299245 | 4.323248  |
| H | -2.410632 | -2.410632 | 3.069069  |
| H | 3.299245  | 3.299245  | 4.323248  |
| H | 2.410632  | 2.410632  | 3.069069  |
| H | 3.299245  | -3.299245 | 4.323248  |
| H | 2.410632  | -2.410632 | 3.069069  |
| H | -3.299245 | 3.299245  | 4.323248  |
| H | -2.410632 | 2.410632  | 3.069069  |
| H | -4.072823 | 2.149706  | 6.361280  |
| H | -4.072823 | -2.149706 | 6.361280  |
| H | -4.784521 | 0.000000  | 7.394232  |
| H | 4.072823  | -2.149706 | 6.361280  |
| H | 4.072823  | 2.149706  | 6.361280  |
| H | 4.784521  | 0.000000  | 7.394232  |
| H | -2.149706 | -4.072823 | 6.361280  |
| H | 2.149706  | -4.072823 | 6.361280  |
| H | 0.000000  | -4.784521 | 7.394232  |
| H | 2.149706  | 4.072823  | 6.361280  |
| H | -2.149706 | 4.072823  | 6.361280  |
| H | 0.000000  | 4.784521  | 7.394232  |
| H | 3.299245  | -3.299245 | -4.323248 |
| H | 2.410632  | -2.410632 | -3.069069 |
| H | -3.299245 | 3.299245  | -4.323248 |
| H | -2.410632 | 2.410632  | -3.069069 |
| H | -3.299245 | -3.299245 | -4.323248 |
| H | -2.410632 | -2.410632 | -3.069069 |
| H | 3.299245  | 3.299245  | -4.323248 |
| H | 2.410632  | 2.410632  | -3.069069 |
| H | 4.072823  | 2.149706  | -6.361280 |
| H | 4.072823  | -2.149706 | -6.361280 |
| H | -4.072823 | -2.149706 | -6.361280 |
| H | -4.072823 | 2.149706  | -6.361280 |
| H | 2.149706  | -4.072823 | -6.361280 |
| H | -2.149706 | -4.072823 | -6.361280 |
| H | -2.149706 | 4.072823  | -6.361280 |
| H | 2.149706  | 4.072823  | -6.361280 |
| H | 4.784521  | 0.000000  | -7.394232 |
| H | -4.784521 | 0.000000  | -7.394232 |

Table 20: Cartesian coordinates of **(2)**  $D_{4h}$  Symmetry M06L / SDDAll, spin singlet, equilibrium N–N distance equals 1.276 Å

| Atom | X        | Y        | Z         |
|------|----------|----------|-----------|
| Nb   | 0.000000 | 0.000000 | 2.458548  |
| Nb   | 0.000000 | 0.000000 | -2.458548 |
| N    | 0.000000 | 0.000000 | -0.637888 |

|   |           |           |           |
|---|-----------|-----------|-----------|
| N | 0.000000  | 0.000000  | 0.637888  |
| C | 1.230764  | 3.020576  | -4.771078 |
| C | 0.000000  | 2.650154  | -4.171464 |
| C | -1.230764 | 3.020576  | -4.771078 |
| C | -1.207519 | 3.788476  | -5.942183 |
| C | 0.000000  | 4.184142  | -6.528307 |
| C | 1.207519  | 3.788476  | -5.942183 |
| O | -1.964558 | 0.000000  | -3.000636 |
| O | 0.000000  | 1.964558  | -3.000636 |
| C | -2.650154 | 0.000000  | -4.171464 |
| C | -3.020576 | -1.230764 | -4.771078 |
| C | -3.788476 | -1.207519 | -5.942183 |
| C | -4.184142 | 0.000000  | -6.528307 |
| C | -3.788476 | 1.207519  | -5.942183 |
| C | -3.020576 | 1.230764  | -4.771078 |
| C | -2.544930 | -2.544930 | -4.174739 |
| C | -1.230764 | -3.020576 | -4.771078 |
| C | 0.000000  | -2.650154 | -4.171464 |
| C | 1.230764  | -3.020576 | -4.771078 |
| C | 1.207519  | -3.788476 | -5.942183 |
| C | 0.000000  | -4.184142 | -6.528307 |
| C | -1.207519 | -3.788476 | -5.942183 |
| C | -2.544930 | 2.544930  | -4.174739 |
| O | 0.000000  | -1.964558 | -3.000636 |
| C | 2.544930  | -2.544930 | -4.174739 |
| C | 3.020576  | -1.230764 | -4.771078 |
| C | 2.650154  | 0.000000  | -4.171464 |
| C | 3.020576  | 1.230764  | -4.771078 |
| C | 3.788476  | 1.207519  | -5.942183 |
| C | 4.184142  | 0.000000  | -6.528307 |
| C | 3.788476  | -1.207519 | -5.942183 |
| O | 1.964558  | 0.000000  | -3.000636 |
| C | 2.544930  | 2.544930  | -4.174739 |
| H | 0.000000  | -4.786310 | -7.434421 |
| H | 0.000000  | 4.786310  | -7.434421 |
| O | 0.000000  | 1.964558  | 3.000636  |
| C | 0.000000  | 2.650154  | 4.171464  |
| C | 1.230764  | 3.020576  | 4.771078  |
| C | 1.207519  | 3.788476  | 5.942183  |
| C | 0.000000  | 4.184142  | 6.528307  |
| C | -1.207519 | 3.788476  | 5.942183  |
| C | -1.230764 | 3.020576  | 4.771078  |
| C | 2.544930  | 2.544930  | 4.174739  |
| C | 3.020576  | 1.230764  | 4.771078  |

|   |           |           |           |
|---|-----------|-----------|-----------|
| C | 2.650154  | 0.000000  | 4.171464  |
| C | 3.020576  | -1.230764 | 4.771078  |
| C | 3.788476  | -1.207519 | 5.942183  |
| C | 4.184142  | 0.000000  | 6.528307  |
| C | 3.788476  | 1.207519  | 5.942183  |
| O | 1.964558  | 0.000000  | 3.000636  |
| C | 2.544930  | -2.544930 | 4.174739  |
| C | 1.230764  | -3.020576 | 4.771078  |
| C | 0.000000  | -2.650154 | 4.171464  |
| C | -1.230764 | -3.020576 | 4.771078  |
| C | -1.207519 | -3.788476 | 5.942183  |
| C | 0.000000  | -4.184142 | 6.528307  |
| C | 1.207519  | -3.788476 | 5.942183  |
| O | 0.000000  | -1.964558 | 3.000636  |
| C | -2.544930 | -2.544930 | 4.174739  |
| C | -3.020576 | -1.230764 | 4.771078  |
| C | -2.650154 | 0.000000  | 4.171464  |
| C | -3.020576 | 1.230764  | 4.771078  |
| C | -3.788476 | 1.207519  | 5.942183  |
| C | -4.184142 | 0.000000  | 6.528307  |
| C | -3.788476 | -1.207519 | 5.942183  |
| O | -1.964558 | 0.000000  | 3.000636  |
| C | -2.544930 | 2.544930  | 4.174739  |
| H | -3.310855 | -3.310855 | 4.357959  |
| H | -2.425407 | -2.425407 | 3.093080  |
| H | 3.310855  | 3.310855  | 4.357959  |
| H | 2.425407  | 2.425407  | 3.093080  |
| H | 3.310855  | -3.310855 | 4.357959  |
| H | 2.425407  | -2.425407 | 3.093080  |
| H | -3.310855 | 3.310855  | 4.357959  |
| H | -2.425407 | 2.425407  | 3.093080  |
| H | -4.074151 | 2.155503  | 6.398950  |
| H | -4.074151 | -2.155503 | 6.398950  |
| H | -4.786310 | 0.000000  | 7.434421  |
| H | 4.074151  | -2.155503 | 6.398950  |
| H | 4.074151  | 2.155503  | 6.398950  |
| H | 4.786310  | 0.000000  | 7.434421  |
| H | -2.155503 | -4.074151 | 6.398950  |
| H | 2.155503  | -4.074151 | 6.398950  |
| H | 0.000000  | -4.786310 | 7.434421  |
| H | 2.155503  | 4.074151  | 6.398950  |
| H | -2.155503 | 4.074151  | 6.398950  |
| H | 0.000000  | 4.786310  | 7.434421  |
| H | 3.310855  | -3.310855 | -4.357959 |

|   |           |           |           |
|---|-----------|-----------|-----------|
| H | 2.425407  | -2.425407 | -3.093080 |
| H | -3.310855 | 3.310855  | -4.357959 |
| H | -2.425407 | 2.425407  | -3.093080 |
| H | -3.310855 | -3.310855 | -4.357959 |
| H | -2.425407 | -2.425407 | -3.093080 |
| H | 3.310855  | 3.310855  | -4.357959 |
| H | 2.425407  | 2.425407  | -3.093080 |
| H | 4.074151  | 2.155503  | -6.398950 |
| H | 4.074151  | -2.155503 | -6.398950 |
| H | -4.074151 | -2.155503 | -6.398950 |
| H | -4.074151 | 2.155503  | -6.398950 |
| H | 2.155503  | -4.074151 | -6.398950 |
| H | -2.155503 | -4.074151 | -6.398950 |
| H | -2.155503 | 4.074151  | -6.398950 |
| H | 2.155503  | 4.074151  | -6.398950 |
| H | 4.786310  | 0.000000  | -7.434421 |
| H | -4.786310 | 0.000000  | -7.434421 |

Table 21: Cartesian coordinates of (**2**)  $D_{4h}$  Symmetry M06 / SDDAll, spin singlet, equilibrium N–N distance equals 1.283 Å

| Atom | X         | Y         | Z         |
|------|-----------|-----------|-----------|
| Nb   | 0.000000  | 0.000000  | 2.444288  |
| Nb   | 0.000000  | 0.000000  | -2.444288 |
| N    | 0.000000  | 0.000000  | -0.641322 |
| N    | 0.000000  | 0.000000  | 0.641322  |
| C    | 1.230647  | 3.019501  | -4.752908 |
| C    | 0.000000  | 2.643675  | -4.154156 |
| C    | -1.230647 | 3.019501  | -4.752908 |
| C    | -1.207406 | 3.797909  | -5.918353 |
| C    | 0.000000  | 4.198852  | -6.502670 |
| C    | 1.207406  | 3.797909  | -5.918353 |
| O    | -1.953928 | 0.000000  | -2.990263 |
| O    | 0.000000  | 1.953928  | -2.990263 |
| C    | -2.643675 | 0.000000  | -4.154156 |
| C    | -3.019501 | -1.230647 | -4.752908 |
| C    | -3.797909 | -1.207406 | -5.918353 |
| C    | -4.198852 | 0.000000  | -6.502670 |
| C    | -3.797909 | 1.207406  | -5.918353 |
| C    | -3.019501 | 1.230647  | -4.752908 |
| C    | -2.550104 | -2.550104 | -4.163355 |
| C    | -1.230647 | -3.019501 | -4.752908 |
| C    | 0.000000  | -2.643675 | -4.154156 |
| C    | 1.230647  | -3.019501 | -4.752908 |
| C    | 1.207406  | -3.797909 | -5.918353 |

|   |           |           |           |   |           |           |           |
|---|-----------|-----------|-----------|---|-----------|-----------|-----------|
| C | 0.000000  | -4.198852 | -6.502670 | C | -3.797909 | -1.207406 | 5.918353  |
| C | -1.207406 | -3.797909 | -5.918353 | O | -1.953928 | 0.000000  | 2.990263  |
| C | -2.550104 | 2.550104  | -4.163355 | C | -2.550104 | 2.550104  | 4.163355  |
| O | 0.000000  | -1.953928 | -2.990263 | H | -3.315288 | -3.315288 | 4.367111  |
| C | 2.550104  | -2.550104 | -4.163355 | H | -2.446912 | -2.446912 | 3.074908  |
| C | 3.019501  | -1.230647 | -4.752908 | H | 3.315288  | 3.315288  | 4.367111  |
| C | 2.643675  | 0.000000  | -4.154156 | H | 2.446912  | 2.446912  | 3.074908  |
| C | 3.019501  | 1.230647  | -4.752908 | H | 3.315288  | -3.315288 | 4.367111  |
| C | 3.797909  | 1.207406  | -5.918353 | H | 2.446912  | -2.446912 | 3.074908  |
| C | 4.198852  | 0.000000  | -6.502670 | H | -3.315288 | 3.315288  | 4.367111  |
| C | 3.797909  | -1.207406 | -5.918353 | H | -2.446912 | 2.446912  | 3.074908  |
| O | 1.953928  | 0.000000  | -2.990263 | H | -4.091057 | 2.157962  | 6.370561  |
| C | 2.550104  | 2.550104  | -4.163355 | H | -4.091057 | -2.157962 | 6.370561  |
| H | 0.000000  | -4.809964 | -7.405471 | H | -4.809964 | 0.000000  | 7.405471  |
| H | 0.000000  | 4.809964  | -7.405471 | H | 4.091057  | -2.157962 | 6.370561  |
| O | 0.000000  | 1.953928  | 2.990263  | H | 4.091057  | 2.157962  | 6.370561  |
| C | 0.000000  | 2.643675  | 4.154156  | H | 4.809964  | 0.000000  | 7.405471  |
| C | 1.230647  | 3.019501  | 4.752908  | H | -2.157962 | -4.091057 | 6.370561  |
| C | 1.207406  | 3.797909  | 5.918353  | H | 2.157962  | -4.091057 | 6.370561  |
| C | 0.000000  | 4.198852  | 6.502670  | H | 0.000000  | -4.809964 | 7.405471  |
| C | -1.207406 | 3.797909  | 5.918353  | H | 2.157962  | 4.091057  | 6.370561  |
| C | -1.230647 | 3.019501  | 4.752908  | H | -2.157962 | 4.091057  | 6.370561  |
| C | 2.550104  | 2.550104  | 4.163355  | H | 0.000000  | 4.809964  | 7.405471  |
| C | 3.019501  | 1.230647  | 4.752908  | H | 3.315288  | -3.315288 | -4.367111 |
| C | 2.643675  | 0.000000  | 4.154156  | H | 2.446912  | -2.446912 | -3.074908 |
| C | 3.019501  | -1.230647 | 4.752908  | H | -3.315288 | 3.315288  | -4.367111 |
| C | 3.797909  | -1.207406 | 5.918353  | H | -2.446912 | 2.446912  | -3.074908 |
| C | 4.198852  | 0.000000  | 6.502670  | H | -3.315288 | -3.315288 | -4.367111 |
| C | 3.797909  | 1.207406  | 5.918353  | H | -2.446912 | -2.446912 | -3.074908 |
| O | 1.953928  | 0.000000  | 2.990263  | H | 3.315288  | 3.315288  | -4.367111 |
| C | 2.550104  | -2.550104 | 4.163355  | H | 2.446912  | 2.446912  | -3.074908 |
| C | 1.230647  | -3.019501 | 4.752908  | H | 4.091057  | 2.157962  | -6.370561 |
| C | 0.000000  | -2.643675 | 4.154156  | H | 4.091057  | -2.157962 | -6.370561 |
| C | -1.230647 | -3.019501 | 4.752908  | H | -4.091057 | -2.157962 | -6.370561 |
| C | -1.207406 | -3.797909 | 5.918353  | H | -4.091057 | 2.157962  | -6.370561 |
| C | 0.000000  | -4.198852 | 6.502670  | H | 2.157962  | -4.091057 | -6.370561 |
| C | 1.207406  | -3.797909 | 5.918353  | H | -2.157962 | -4.091057 | -6.370561 |
| O | 0.000000  | -1.953928 | 2.990263  | H | -2.157962 | 4.091057  | -6.370561 |
| C | -2.550104 | -2.550104 | 4.163355  | H | 2.157962  | 4.091057  | -6.370561 |
| C | -3.019501 | -1.230647 | 4.752908  | H | 4.809964  | 0.000000  | -7.405471 |
| C | -2.643675 | 0.000000  | 4.154156  | H | -4.809964 | 0.000000  | -7.405471 |
| C | -3.019501 | 1.230647  | 4.752908  |   |           |           |           |
| C | -3.797909 | 1.207406  | 5.918353  |   |           |           |           |
| C | -4.198852 | 0.000000  | 6.502670  |   |           |           |           |

Table 22: Cartesian coordinates of **(2)**  $D_{4h}$  Symmetry PBE1PBE (PBE0) / SDDAll, spin singlet, equilibrium N–N distance equals 1.277 Å

| Atom | X        | Y        | Z        |
|------|----------|----------|----------|
| Nb   | 0.000000 | 0.000000 | 2.437125 |

|    |           |           |           |   |           |           |          |
|----|-----------|-----------|-----------|---|-----------|-----------|----------|
| Nb | 0.000000  | 0.000000  | -2.437125 | C | 2.538400  | 2.538400  | 4.147890 |
| N  | 0.000000  | 0.000000  | -0.638291 | C | 3.019626  | 1.227674  | 4.739987 |
| N  | 0.000000  | 0.000000  | 0.638291  | C | 2.643663  | 0.000000  | 4.147958 |
| C  | 1.227674  | 3.019626  | -4.739987 | C | 3.019626  | -1.227674 | 4.739987 |
| C  | 0.000000  | 2.643663  | -4.147958 | C | 3.811293  | -1.204241 | 5.890705 |
| C  | -1.227674 | 3.019626  | -4.739987 | C | 4.217901  | 0.000000  | 6.466178 |
| C  | -1.204241 | 3.811293  | -5.890705 | C | 3.811293  | 1.204241  | 5.890705 |
| C  | 0.000000  | 4.217901  | -6.466178 | O | 1.938505  | 0.000000  | 2.994670 |
| C  | 1.204241  | 3.811293  | -5.890705 | C | 2.538400  | -2.538400 | 4.147890 |
| O  | -1.938505 | 0.000000  | -2.994670 | C | 1.227674  | -3.019626 | 4.739987 |
| O  | 0.000000  | 1.938505  | -2.994670 | C | 0.000000  | -2.643663 | 4.147958 |
| C  | -2.643663 | 0.000000  | -4.147958 | C | -1.227674 | -3.019626 | 4.739987 |
| C  | -3.019626 | -1.227674 | -4.739987 | C | -1.204241 | -3.811293 | 5.890705 |
| C  | -3.811293 | -1.204241 | -5.890705 | C | 0.000000  | -4.217901 | 6.466178 |
| C  | -4.217901 | 0.000000  | -6.466178 | C | 1.204241  | -3.811293 | 5.890705 |
| C  | -3.811293 | 1.204241  | -5.890705 | O | 0.000000  | -1.938505 | 2.994670 |
| C  | -3.019626 | 1.227674  | -4.739987 | C | -2.538400 | -2.538400 | 4.147890 |
| C  | -2.538400 | -2.538400 | -4.147890 | C | -3.019626 | -1.227674 | 4.739987 |
| C  | -1.227674 | -3.019626 | -4.739987 | C | -2.643663 | 0.000000  | 4.147958 |
| C  | 0.000000  | -2.643663 | -4.147958 | C | -3.019626 | 1.227674  | 4.739987 |
| C  | 1.227674  | -3.019626 | -4.739987 | C | -3.811293 | 1.204241  | 5.890705 |
| C  | 1.204241  | -3.811293 | -5.890705 | C | -4.217901 | 0.000000  | 6.466178 |
| C  | 0.000000  | -4.217901 | -6.466178 | C | -3.811293 | -1.204241 | 5.890705 |
| C  | -1.204241 | -3.811293 | -5.890705 | O | -1.938505 | 0.000000  | 2.994670 |
| C  | -2.538400 | 2.538400  | -4.147890 | C | -2.538400 | 2.538400  | 4.147890 |
| O  | 0.000000  | -1.938505 | -2.994670 | H | -3.303614 | -3.303614 | 4.323610 |
| C  | 2.538400  | -2.538400 | -4.147890 | H | -2.416660 | -2.416660 | 3.067902 |
| C  | 3.019626  | -1.227674 | -4.739987 | H | 3.303614  | 3.303614  | 4.323610 |
| C  | 2.643663  | 0.000000  | -4.147958 | H | 2.416660  | 2.416660  | 3.067902 |
| C  | 3.019626  | 1.227674  | -4.739987 | H | 3.303614  | -3.303614 | 4.323610 |
| C  | 3.811293  | 1.204241  | -5.890705 | H | 2.416660  | -2.416660 | 3.067902 |
| C  | 4.217901  | 0.000000  | -6.466178 | H | -3.303614 | 3.303614  | 4.323610 |
| C  | 3.811293  | -1.204241 | -5.890705 | H | -2.416660 | 2.416660  | 3.067902 |
| O  | 1.938505  | 0.000000  | -2.994670 | H | -4.106829 | 2.148553  | 6.341524 |
| C  | 2.538400  | 2.538400  | -4.147890 | H | -4.106829 | -2.148553 | 6.341524 |
| H  | 0.000000  | -4.837543 | -7.357702 | H | -4.837543 | 0.000000  | 7.357702 |
| H  | 0.000000  | 4.837543  | -7.357702 | H | 4.106829  | -2.148553 | 6.341524 |
| O  | 0.000000  | 1.938505  | 2.994670  | H | 4.106829  | 2.148553  | 6.341524 |
| C  | 0.000000  | 2.643663  | 4.147958  | H | 4.837543  | 0.000000  | 7.357702 |
| C  | 1.227674  | 3.019626  | 4.739987  | H | -2.148553 | -4.106829 | 6.341524 |
| C  | 1.204241  | 3.811293  | 5.890705  | H | 2.148553  | -4.106829 | 6.341524 |
| C  | 0.000000  | 4.217901  | 6.466178  | H | 0.000000  | -4.837543 | 7.357702 |
| C  | -1.204241 | 3.811293  | 5.890705  | H | 2.148553  | 4.106829  | 6.341524 |
| C  | -1.227674 | 3.019626  | 4.739987  | H | -2.148553 | 4.106829  | 6.341524 |

|   |           |           |           |   |           |           |           |
|---|-----------|-----------|-----------|---|-----------|-----------|-----------|
| H | 0.000000  | 4.837543  | 7.357702  | C | 1.207683  | -3.842960 | -5.923175 |
| H | 3.303614  | -3.303614 | -4.323610 | C | 0.000000  | -4.255372 | -6.496660 |
| H | 2.416660  | -2.416660 | -3.067902 | C | -1.207683 | -3.842960 | -5.923175 |
| H | -3.303614 | 3.303614  | -4.323610 | C | -2.555081 | 2.555081  | -4.187049 |
| H | -2.416660 | 2.416660  | -3.067902 | O | 0.000000  | -1.949159 | -3.021978 |
| H | -3.303614 | -3.303614 | -4.323610 | C | 2.555081  | -2.555081 | -4.187049 |
| H | -2.416660 | -2.416660 | -3.067902 | C | 3.040675  | -1.232268 | -4.774687 |
| H | 3.303614  | 3.303614  | -4.323610 | C | 2.662601  | 0.000000  | -4.182752 |
| H | 2.416660  | 2.416660  | -3.067902 | C | 3.040675  | 1.232268  | -4.774687 |
| H | 4.106829  | 2.148553  | -6.341524 | C | 3.842960  | 1.207683  | -5.923175 |
| H | 4.106829  | -2.148553 | -6.341524 | C | 4.255372  | 0.000000  | -6.496660 |
| H | -4.106829 | -2.148553 | -6.341524 | C | 3.842960  | -1.207683 | -5.923175 |
| H | -4.106829 | 2.148553  | -6.341524 | O | 1.949159  | 0.000000  | -3.021978 |
| H | 2.148553  | -4.106829 | -6.341524 | C | 2.555081  | 2.555081  | -4.187049 |
| H | -2.148553 | -4.106829 | -6.341524 | H | 0.000000  | -4.882513 | -7.383728 |
| H | -2.148553 | 4.106829  | -6.341524 | H | 0.000000  | 4.882513  | -7.383728 |
| H | 2.148553  | 4.106829  | -6.341524 | O | 0.000000  | 1.949159  | 3.021978  |
| H | 4.837543  | 0.000000  | -7.357702 | C | 0.000000  | 2.662601  | 4.182752  |
| H | -4.837543 | 0.000000  | -7.357702 | C | 1.232268  | 3.040675  | 4.774687  |

Table 23: Cartesian coordinates of **(2)**  $D_{4h}$  Symmetry X3LYP / SDDAll, spin singlet, equilibrium N–N distance equals 1.283 Å

| Atom | X         | Y         | Z         |
|------|-----------|-----------|-----------|
| Nb   | 0.000000  | 0.000000  | 2.455051  |
| Nb   | 0.000000  | 0.000000  | -2.455051 |
| N    | 0.000000  | 0.000000  | -0.641578 |
| N    | 0.000000  | 0.000000  | 0.641578  |
| C    | 1.232268  | 3.040675  | -4.774687 |
| C    | 0.000000  | 2.662601  | -4.182752 |
| C    | -1.232268 | 3.040675  | -4.774687 |
| C    | -1.207683 | 3.842960  | -5.923175 |
| C    | 0.000000  | 4.255372  | -6.496660 |
| C    | 1.207683  | 3.842960  | -5.923175 |
| O    | -1.949159 | 0.000000  | -3.021978 |
| O    | 0.000000  | 1.949159  | -3.021978 |
| C    | -2.662601 | 0.000000  | -4.182752 |
| C    | -3.040675 | -1.232268 | -4.774687 |
| C    | -3.842960 | -1.207683 | -5.923175 |
| C    | -4.255372 | 0.000000  | -6.496660 |
| C    | -3.842960 | 1.207683  | -5.923175 |
| C    | -3.040675 | 1.232268  | -4.774687 |
| C    | -2.555081 | -2.555081 | -4.187049 |
| C    | -1.232268 | -3.040675 | -4.774687 |
| C    | 0.000000  | -2.662601 | -4.182752 |
| C    | 1.232268  | -3.040675 | -4.774687 |

|   |           |           |           |
|---|-----------|-----------|-----------|
| C | 1.207683  | -3.842960 | -5.923175 |
| C | 0.000000  | -4.255372 | -6.496660 |
| C | -1.207683 | -3.842960 | -5.923175 |
| C | -2.555081 | 2.555081  | -4.187049 |
| O | 0.000000  | -1.949159 | -3.021978 |
| C | 2.555081  | -2.555081 | -4.187049 |
| C | 3.040675  | -1.232268 | -4.774687 |
| C | 2.662601  | 0.000000  | -4.182752 |
| C | 3.040675  | 1.232268  | -4.774687 |
| C | 3.842960  | 1.207683  | -5.923175 |
| C | 4.255372  | 0.000000  | -6.496660 |
| C | 3.842960  | -1.207683 | -5.923175 |
| O | 1.949159  | 0.000000  | -3.021978 |
| C | 2.555081  | 2.555081  | -4.187049 |
| H | 0.000000  | -4.882513 | -7.383728 |
| H | 0.000000  | 4.882513  | -7.383728 |
| O | 0.000000  | 1.949159  | 3.021978  |
| C | 0.000000  | 2.662601  | 4.182752  |
| C | 1.232268  | 3.040675  | 4.774687  |
| C | 1.207683  | 3.842960  | 5.923175  |
| C | 0.000000  | 4.255372  | 6.496660  |
| C | -1.207683 | 3.842960  | 5.923175  |
| C | -1.232268 | 3.040675  | 4.774687  |
| C | 2.555081  | 2.555081  | 4.187049  |
| C | 3.040675  | 1.232268  | 4.774687  |
| C | 2.662601  | 0.000000  | 4.182752  |
| C | 3.040675  | -1.232268 | 4.774687  |
| C | 3.842960  | -1.207683 | 5.923175  |
| C | 4.255372  | 0.000000  | 6.496660  |
| C | 3.842960  | 1.207683  | 5.923175  |
| O | 1.949159  | 0.000000  | 3.021978  |
| C | 2.555081  | -2.555081 | 4.187049  |
| C | 1.232268  | -3.040675 | 4.774687  |
| C | 0.000000  | -2.662601 | 4.182752  |
| C | -1.232268 | -3.040675 | 4.774687  |
| C | -1.207683 | -3.842960 | 5.923175  |
| C | 0.000000  | -4.255372 | 6.496660  |
| C | 1.207683  | -3.842960 | 5.923175  |
| O | 0.000000  | -1.949159 | 3.021978  |
| C | -2.555081 | -2.555081 | 4.187049  |
| C | -3.040675 | -1.232268 | 4.774687  |
| C | -2.662601 | 0.000000  | 4.182752  |
| C | -3.040675 | 1.232268  | 4.774687  |
| C | -3.842960 | 1.207683  | 5.923175  |



|   |           |           |           |    |           |           |           |
|---|-----------|-----------|-----------|----|-----------|-----------|-----------|
| C | -4.255372 | 0.000000  | 6.496660  | Nb | 0.000000  | 0.000000  | 2.470198  |
| C | -3.842960 | -1.207683 | 5.923175  | Nb | 0.000000  | 0.000000  | -2.470198 |
| O | -1.949159 | 0.000000  | 3.021978  | N  | 0.000000  | 0.000000  | -0.639437 |
| C | -2.555081 | 2.555081  | 4.187049  | N  | 0.000000  | 0.000000  | 0.639437  |
| H | -3.318873 | -3.318873 | 4.378653  | C  | 1.239483  | 3.049670  | -4.773621 |
| H | -2.444939 | -2.444939 | 3.105190  | C  | 0.000000  | 2.668747  | -4.177291 |
| H | 3.318873  | 3.318873  | 4.378653  | C  | -1.239483 | 3.049670  | -4.773621 |
| H | 2.444939  | 2.444939  | 3.105190  | C  | -1.214263 | 3.854424  | -5.929153 |
| H | 3.318873  | -3.318873 | 4.378653  | C  | 0.000000  | 4.268643  | -6.505858 |
| H | 2.444939  | -2.444939 | 3.105190  | C  | 1.214263  | 3.854424  | -5.929153 |
| H | -3.318873 | 3.318873  | 4.378653  | O  | -1.964552 | 0.000000  | -3.004562 |
| H | -2.444939 | 2.444939  | 3.105190  | O  | 0.000000  | 1.964552  | -3.004562 |
| H | -4.142823 | 2.151429  | 6.373144  | C  | -2.668747 | 0.000000  | -4.177291 |
| H | -4.142823 | -2.151429 | 6.373144  | C  | -3.049670 | -1.239483 | -4.773621 |
| H | -4.882513 | 0.000000  | 7.383728  | C  | -3.854424 | -1.214263 | -5.929153 |
| H | 4.142823  | -2.151429 | 6.373144  | C  | -4.268643 | 0.000000  | -6.505858 |
| H | 4.142823  | 2.151429  | 6.373144  | C  | -3.854424 | 1.214263  | -5.929153 |
| H | 4.882513  | 0.000000  | 7.383728  | C  | -3.049670 | 1.239483  | -4.773621 |
| H | -2.151429 | -4.142823 | 6.373144  | C  | -2.562733 | -2.562733 | -4.181736 |
| H | 2.151429  | -4.142823 | 6.373144  | C  | -1.239483 | -3.049670 | -4.773621 |
| H | 0.000000  | -4.882513 | 7.383728  | C  | 0.000000  | -2.668747 | -4.177291 |
| H | 2.151429  | 4.142823  | 6.373144  | C  | 1.239483  | -3.049670 | -4.773621 |
| H | -2.151429 | 4.142823  | 6.373144  | C  | 1.214263  | -3.854424 | -5.929153 |
| H | 0.000000  | 4.882513  | 7.383728  | C  | 0.000000  | -4.268643 | -6.505858 |
| H | 3.318873  | -3.318873 | -4.378653 | C  | -1.214263 | -3.854424 | -5.929153 |
| H | 2.444939  | -2.444939 | -3.105190 | C  | -2.562733 | 2.562733  | -4.181736 |
| H | -3.318873 | 3.318873  | -4.378653 | O  | 0.000000  | -1.964552 | -3.004562 |
| H | -2.444939 | 2.444939  | -3.105190 | C  | 2.562733  | -2.562733 | -4.181736 |
| H | -3.318873 | -3.318873 | -4.378653 | C  | 3.049670  | -1.239483 | -4.773621 |
| H | -2.444939 | -2.444939 | -3.105190 | C  | 2.668747  | 0.000000  | -4.177291 |
| H | 3.318873  | 3.318873  | -4.378653 | C  | 3.049670  | 1.239483  | -4.773621 |
| H | 2.444939  | 2.444939  | -3.105190 | C  | 3.854424  | 1.214263  | -5.929153 |
| H | 4.142823  | 2.151429  | -6.373144 | C  | 4.268643  | 0.000000  | -6.505858 |
| H | 4.142823  | -2.151429 | -6.373144 | C  | 3.854424  | -1.214263 | -5.929153 |
| H | -4.142823 | -2.151429 | -6.373144 | O  | 1.964552  | 0.000000  | -3.004562 |
| H | -4.142823 | 2.151429  | -6.373144 | C  | 2.562733  | 2.562733  | -4.181736 |
| H | 2.151429  | -4.142823 | -6.373144 | H  | 0.000000  | -4.900746 | -7.400129 |
| H | -2.151429 | -4.142823 | -6.373144 | H  | 0.000000  | 4.900746  | -7.400129 |
| H | -2.151429 | 4.142823  | -6.373144 | O  | 0.000000  | 1.964552  | 3.004562  |
| H | 2.151429  | 4.142823  | -6.373144 | C  | 0.000000  | 2.668747  | 4.177291  |
| H | 4.882513  | 0.000000  | -7.383728 | C  | 1.239483  | 3.049670  | 4.773621  |
| H | -4.882513 | 0.000000  | -7.383728 | C  | 1.214263  | 3.854424  | 5.929153  |
|   |           |           |           | C  | 0.000000  | 4.268643  | 6.505858  |
|   |           |           |           | C  | -1.214263 | 3.854424  | 5.929153  |

Table 24: Cartesian coordinates of **(2)**  $D_{4h}$  Symmetry GGA Becke Perdew / SDDAll, spin singlet, equilibrium N–N distance equals 1.279 Å

| Atom | X | Y | Z |
|------|---|---|---|
|------|---|---|---|



|   |           |           |          |   |           |           |           |
|---|-----------|-----------|----------|---|-----------|-----------|-----------|
| C | -1.239483 | 3.049670  | 4.773621 | H | -2.166122 | 4.155710  | 6.382587  |
| C | 2.562733  | 2.562733  | 4.181736 | H | 0.000000  | 4.900746  | 7.400129  |
| C | 3.049670  | 1.239483  | 4.773621 | H | 3.333500  | -3.333500 | -4.366699 |
| C | 2.668747  | 0.000000  | 4.177291 | H | 2.444613  | -2.444613 | -3.091834 |
| C | 3.049670  | -1.239483 | 4.773621 | H | -3.333500 | 3.333500  | -4.366699 |
| C | 3.854424  | -1.214263 | 5.929153 | H | -2.444613 | 2.444613  | -3.091834 |
| C | 4.268643  | 0.000000  | 6.505858 | H | -3.333500 | -3.333500 | -4.366699 |
| C | 3.854424  | 1.214263  | 5.929153 | H | -2.444613 | -2.444613 | -3.091834 |
| O | 1.964552  | 0.000000  | 3.004562 | H | 3.333500  | 3.333500  | -4.366699 |
| C | 2.562733  | -2.562733 | 4.181736 | H | 2.444613  | 2.444613  | -3.091834 |
| C | 1.239483  | -3.049670 | 4.773621 | H | 4.155710  | 2.166122  | -6.382587 |
| C | 0.000000  | -2.668747 | 4.177291 | H | 4.155710  | -2.166122 | -6.382587 |
| C | -1.239483 | -3.049670 | 4.773621 | H | -4.155710 | -2.166122 | -6.382587 |
| C | -1.214263 | -3.854424 | 5.929153 | H | -4.155710 | 2.166122  | -6.382587 |
| C | 0.000000  | -4.268643 | 6.505858 | H | 2.166122  | -4.155710 | -6.382587 |
| C | 1.214263  | -3.854424 | 5.929153 | H | -2.166122 | -4.155710 | -6.382587 |
| O | 0.000000  | -1.964552 | 3.004562 | H | -2.166122 | 4.155710  | -6.382587 |
| C | -2.562733 | -2.562733 | 4.181736 | H | 2.166122  | 4.155710  | -6.382587 |
| C | -3.049670 | -1.239483 | 4.773621 | H | 4.900746  | 0.000000  | -7.400129 |
| C | -2.668747 | 0.000000  | 4.177291 | H | -4.900746 | 0.000000  | -7.400129 |
| C | -3.049670 | 1.239483  | 4.773621 |   |           |           |           |
| C | -3.854424 | 1.214263  | 5.929153 |   |           |           |           |
| C | -4.268643 | 0.000000  | 6.505858 |   |           |           |           |
| C | -3.854424 | -1.214263 | 5.929153 |   |           |           |           |
| O | -1.964552 | 0.000000  | 3.004562 |   |           |           |           |
| C | -2.562733 | 2.562733  | 4.181736 |   |           |           |           |
| H | -3.333500 | -3.333500 | 4.366699 |   |           |           |           |
| H | -2.444613 | -2.444613 | 3.091834 |   |           |           |           |
| H | 3.333500  | 3.333500  | 4.366699 |   |           |           |           |
| H | 2.444613  | 2.444613  | 3.091834 |   |           |           |           |
| H | 3.333500  | -3.333500 | 4.366699 |   |           |           |           |
| H | 2.444613  | -2.444613 | 3.091834 |   |           |           |           |
| H | -3.333500 | 3.333500  | 4.366699 |   |           |           |           |
| H | -2.444613 | 2.444613  | 3.091834 |   |           |           |           |
| H | -4.155710 | 2.166122  | 6.382587 |   |           |           |           |
| H | -4.155710 | -2.166122 | 6.382587 |   |           |           |           |
| H | -4.900746 | 0.000000  | 7.400129 |   |           |           |           |
| H | 4.155710  | -2.166122 | 6.382587 |   |           |           |           |
| H | 4.155710  | 2.166122  | 6.382587 |   |           |           |           |
| H | 4.900746  | 0.000000  | 7.400129 |   |           |           |           |
| H | -2.166122 | -4.155710 | 6.382587 |   |           |           |           |
| H | 2.166122  | -4.155710 | 6.382587 |   |           |           |           |
| H | 0.000000  | -4.900746 | 7.400129 |   |           |           |           |
| H | 2.166122  | 4.155710  | 6.382587 |   |           |           |           |
